# Supplementary material
Source: MDPI journal article supplement (https://www.mdpi.com/1424-8247/14/9/916)
Supplement: s1 [file s1]

# Chemoreversal agents from Taiwanofungus genus and their more potent methyl derivatives targeting STAT3 phosphorylation

Ko-Hua Yu <sup>1</sup> Chin-Chuan Hung <sup>2,3,4</sup>, Tian-Shung Wu <sup>1,5</sup>, Chin-Fu Chen <sup>6</sup>, I-Ting Wu <sup>2</sup>,  
Ping-Chung Kuo <sup>1</sup>, Sio-Hong Lam <sup>1</sup> and Hsin-Yi Hung <sup>1,\*</sup>

<sup>1</sup> School of Pharmacy, College of Medicine, National Cheng Kung University,  
Tainan 701, Taiwan; s68071061@gs.ncku.edu.tw (K.-H.Y.); tswu@mail.ncku.edu.tw  
(T.-S.W.); z10502016@email.ncku.edu.tw (P.-C.K.); shlam@mail.ncku.edu.tw (S.-  
H.L.)

<sup>2</sup> Department of Pharmacy, College of Pharmacy, China Medical University,  
Taichung 406, Taiwan; cchung@mail.cmu.edu.tw (C.-C.H.); 105015202@cmu.edu.tw  
(I.-T.W.)

<sup>3</sup> Department of Pharmacy, China Medical University Hospital, Taichung 404,  
Taiwan

<sup>4</sup> Department of Healthcare Administration, Asia University, Taichung 500,  
Taiwan

<sup>5</sup> Department of Pharmacy, College of Pharmacy and Health Care, Tajen  
University, Pingtung, 907, Taiwan

6 Department of Life Sciences, National Cheng Kung University, Tainan 701,  
Taiwan; chin-fu9999@gmail.com

\* Correspondence: z10308005@email.ncku.edu.tw

## Table of Content

|                                                                                                                                                                                                      |    |
|------------------------------------------------------------------------------------------------------------------------------------------------------------------------------------------------------|----|
| Figure S1 $^1\text{H}$ NMR (500 MHz, $\text{CDCl}_3$ ) spectrum of methyl $3\alpha,7\alpha,12\alpha$ -trihydroxy- $4\alpha$ -methylergosta-8,24(28)-dien-11-on-26-oate. (6).....                     | 5  |
| Figure S2 $^{13}\text{C}$ NMR (125 MHz, $\text{CDCl}_3$ ) spectrum of methyl $3\alpha,7\alpha,12\alpha$ -trihydroxy- $4\alpha$ -methylergosta-8,24(28)-dien-11-on-26-oate. (6).....                  | 6  |
| Figure S3 $^1\text{H}$ NMR (500 MHz, $\text{CDCl}_3$ ) spectrum of zhankuic acid A methyl ester. (8).....                                                                                            | 7  |
| Figure S4 $^{13}\text{C}$ NMR (125 MHz, $\text{CDCl}_3$ ) spectrum of zhankuic acid A methyl ester. (8).....                                                                                         | 8  |
| Figure S5 $^1\text{H}$ NMR (500 MHz, $\text{CDCl}_3$ ) spectrum of methyl $7\alpha,12\alpha$ -dihydroxy-3,11-dioxo- $4\alpha$ -methylergosta-8,24(28)-dien-26-oate. (10).....                        | 9  |
| Figure S6 $^{13}\text{C}$ NMR (125 MHz, $\text{CDCl}_3$ ) spectrum of methyl $7\alpha,12\alpha$ -dihydroxy-3,11-dioxo- $4\alpha$ -methylergosta-8,24(28)-dien-26-oate. (10).....                     | 10 |
| Figure S7 $^1\text{H}$ NMR (500 MHz, $\text{CDCl}_3$ ) spectrum of methyl- $7\beta$ -hydroxy-3,11-dioxo- $4\alpha$ -methylergosta-8,24(28)-dien-26-oate. (12) .....                                  | 11 |
| Figure S8 $^{13}\text{C}$ NMR (125 MHz, $\text{CDCl}_3$ ) spectrum of methyl- $7\beta$ -hydroxy-3,11-dioxo- $4\alpha$ -methylergosta-8,24(28)-dien-26-oate. (12) .....                               | 12 |
| Figure S9 $^1\text{H}$ NMR (500 MHz, acetone- $d_6$ ) spectrum of methyl $3\alpha,4\beta,7\beta$ -trihydroxyergosta-8,24(28)-dien-11-on-26-oate (methyl antcamphorol D, 14).....                     | 13 |
| Figure S10 $^{13}\text{C}$ NMR (125 MHz, acetone- $d_6$ ) spectrum of methyl $3\alpha,4\beta,7\beta$ -trihydroxyergosta-8,24(28)-dien-11-on-26-oate (methyl antcamphorol D, 14).....                 | 14 |
| Figure S11 $^1\text{H}$ NMR (500 MHz, $\text{CDCl}_3$ ) spectrum of methyl $3\alpha,12\alpha$ -dihydroxy $4\alpha$ -methylergosta-8,24(28)-diene-7,11-dion-26-oate (methyl antcinate H, 16). .....   | 15 |
| Figure S12 $^{13}\text{C}$ NMR (125 MHz, $\text{CDCl}_3$ ) spectrum of methyl $3\alpha,12\alpha$ -dihydroxy $4\alpha$ -methylergosta-8,24(28)-diene-7,11-dion-26-oate (methyl antcinate H, 16) ..... | 16 |
| Figure S13 $^1\text{H}$ NMR (500 MHz, $\text{CDCl}_3$ ) spectrum of zhankuic acid methyl ester C 3-O-formate. (18).....                                                                              | 17 |
| Figure S14 $^{13}\text{C}$ NMR (125 MHz, $\text{CDCl}_3$ ) spectrum of zhankuic acid methyl ester C 3-O-formate. (18).....                                                                           | 18 |

|                                                                                                                                                                                                             |    |
|-------------------------------------------------------------------------------------------------------------------------------------------------------------------------------------------------------------|----|
| Figure S15 $^1\text{H}$ NMR (500 MHz, $\text{CDCl}_3$ ) spectrum of methyl 3 $\alpha$ -hydroxy-7,11-dioxo-4 $\alpha$ -methylergosta-8,24(28)-dien-26-oate. ( <b>20</b> ) .....                              | 19 |
| Figure S16 $^{13}\text{C}$ NMR (125 MHz, $\text{CDCl}_3$ ) spectrum of methyl 3 $\alpha$ -hydroxy-7,11-dioxo-4 $\alpha$ -methylergosta-8,24(28)-dien-26-oate. ( <b>20</b> ) .....                           | 20 |
| Figure S17 $^1\text{H}$ NMR (500 MHz, $\text{CDCl}_3$ ) spectrum of methyl 7 $\beta$ -hydroxy-3,11-dioxo-4 $\alpha$ -methylergosta-8,24(28)-dien-26-oate. ( <b>22</b> ) .....                               | 21 |
| Figure S18 $^{13}\text{C}$ NMR (125 MHz, $\text{CDCl}_3$ ) spectrum of methyl 7 $\beta$ -hydroxy-3,11-dioxo-4 $\alpha$ -methylergosta-8,24(28)-dien-26-oate. ( <b>22</b> ) .....                            | 22 |
| Figure S19 $^1\text{H}$ NMR (500 MHz, $\text{CDCl}_3$ ) spectrum of methyl 4 $\alpha$ -methylergosta-8,24(28)-diene-3,11-dien-26-oate. ( <b>24</b> ).....                                                   | 23 |
| Figure S20 $^{13}\text{C}$ NMR (125 MHz, $\text{CDCl}_3$ ) spectrum of methyl 4 $\alpha$ -methylergosta-8,24(28)-diene-3,11-dien-26-oate. ( <b>24</b> ).....                                                | 24 |
| Figure S21 $^1\text{H}$ NMR (500 MHz, $\text{CDCl}_3$ ) spectrum of methyl 3 $\alpha$ ,7 $\beta$ -dihydroxy-4 $\alpha$ -methylergosta-8,24(28)-dien-11-on-26-oate. ( <b>26</b> ).....                       | 25 |
| Figure S22 $^{13}\text{C}$ NMR (125 MHz, $\text{CDCl}_3$ ) spectrum of methyl 3 $\alpha$ ,7 $\beta$ -dihydroxy-4 $\alpha$ -methylergosta-8,24(28)-dien-11-on-26-oate. ( <b>26</b> ).....                    | 26 |
| Figure S23 $^1\text{H}$ NMR (500 MHz, $\text{CDCl}_3$ ) spectrum of methyl 3 $\beta$ ,12 $\beta$ -dihydroxy-11-oxo-4 $\beta$ -methylergosta-8,24(28)-dien-26-oate (methyl antcin M). ( <b>28</b> ) .....    | 27 |
| Figure S24 $^{13}\text{C}$ NMR (125 MHz, $\text{CDCl}_3$ ) spectrum of methyl 3 $\beta$ ,12 $\beta$ -dihydroxy-11-oxo-4 $\beta$ -methylergosta-8,24(28)-dien-26-oate (methyl antcin M). ( <b>28</b> ) ..... | 28 |
| Figure S25 References for known compounds.....                                                                                                                                                              | 29 |

Figure S1  $^1\text{H}$  NMR (500 MHz,  $\text{CDCl}_3$ ) spectrum of methyl 3 $\alpha$ ,7 $\alpha$ ,12 $\alpha$ -trihydroxy-4 $\alpha$ -methylergosta-8,24(28)-dien-11-on-26-oate. (6)

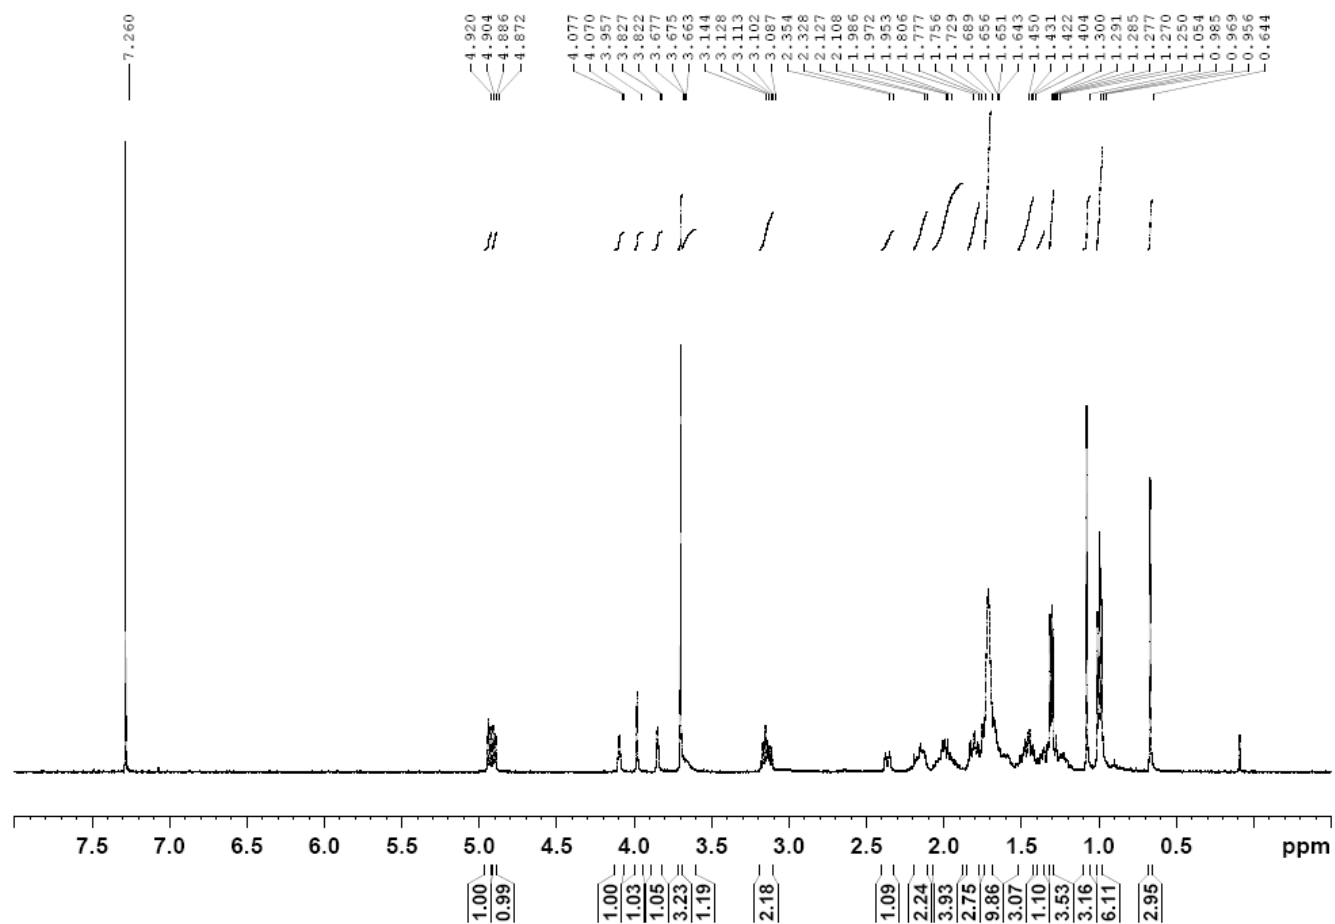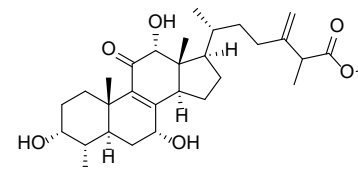

**Figure S2**  $^{13}\text{C}$  NMR (125 MHz,  $\text{CDCl}_3$ ) spectrum of methyl 3 $\alpha$ ,7 $\alpha$ ,12 $\alpha$ -trihydroxy-4 $\alpha$ -methylergosta-8,24(28)-dien-11-on-26-oate.  
(6)

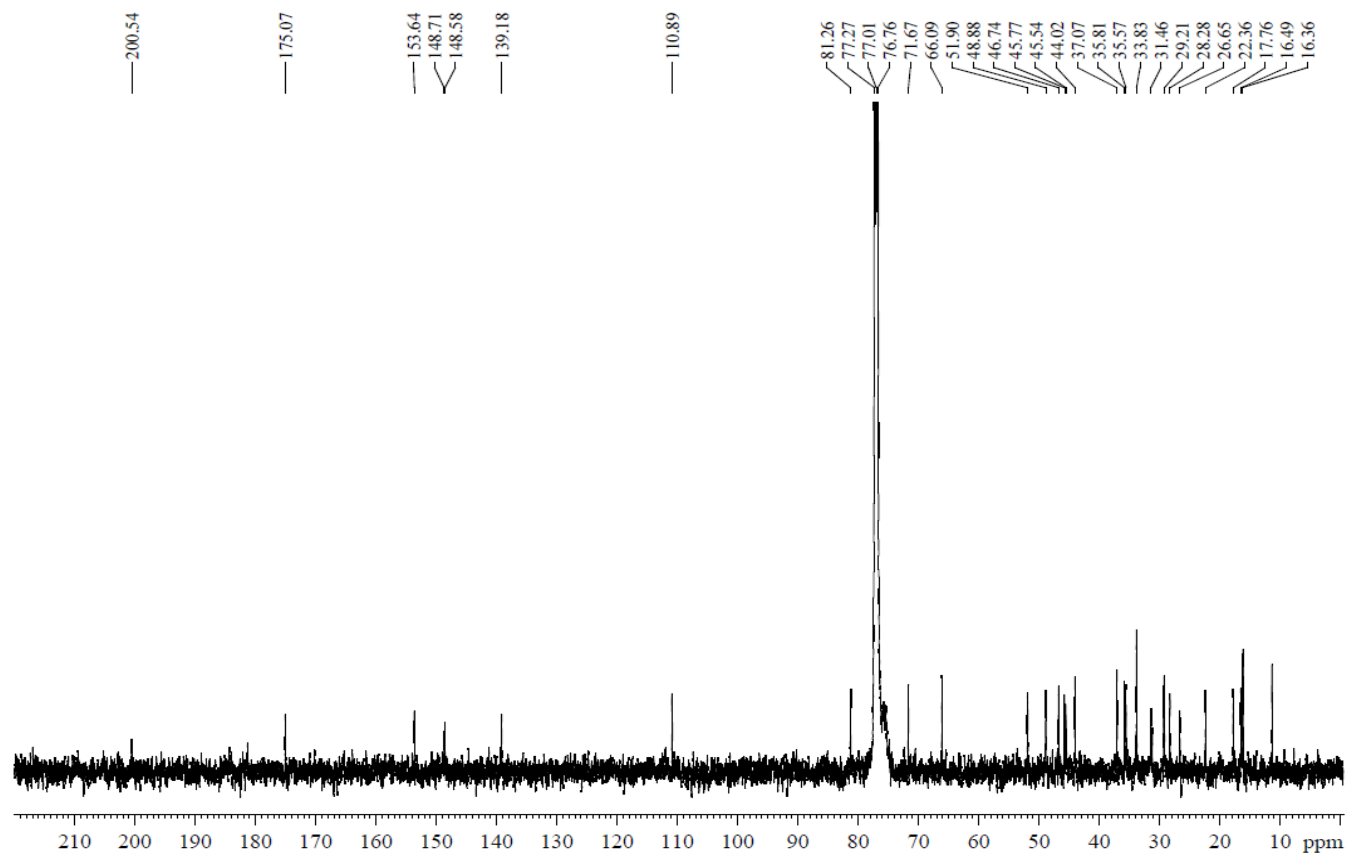

**Figure S3**  $^1\text{H}$  NMR (500 MHz,  $\text{CDCl}_3$ ) spectrum of zhankuic acid A methyl ester. (8)

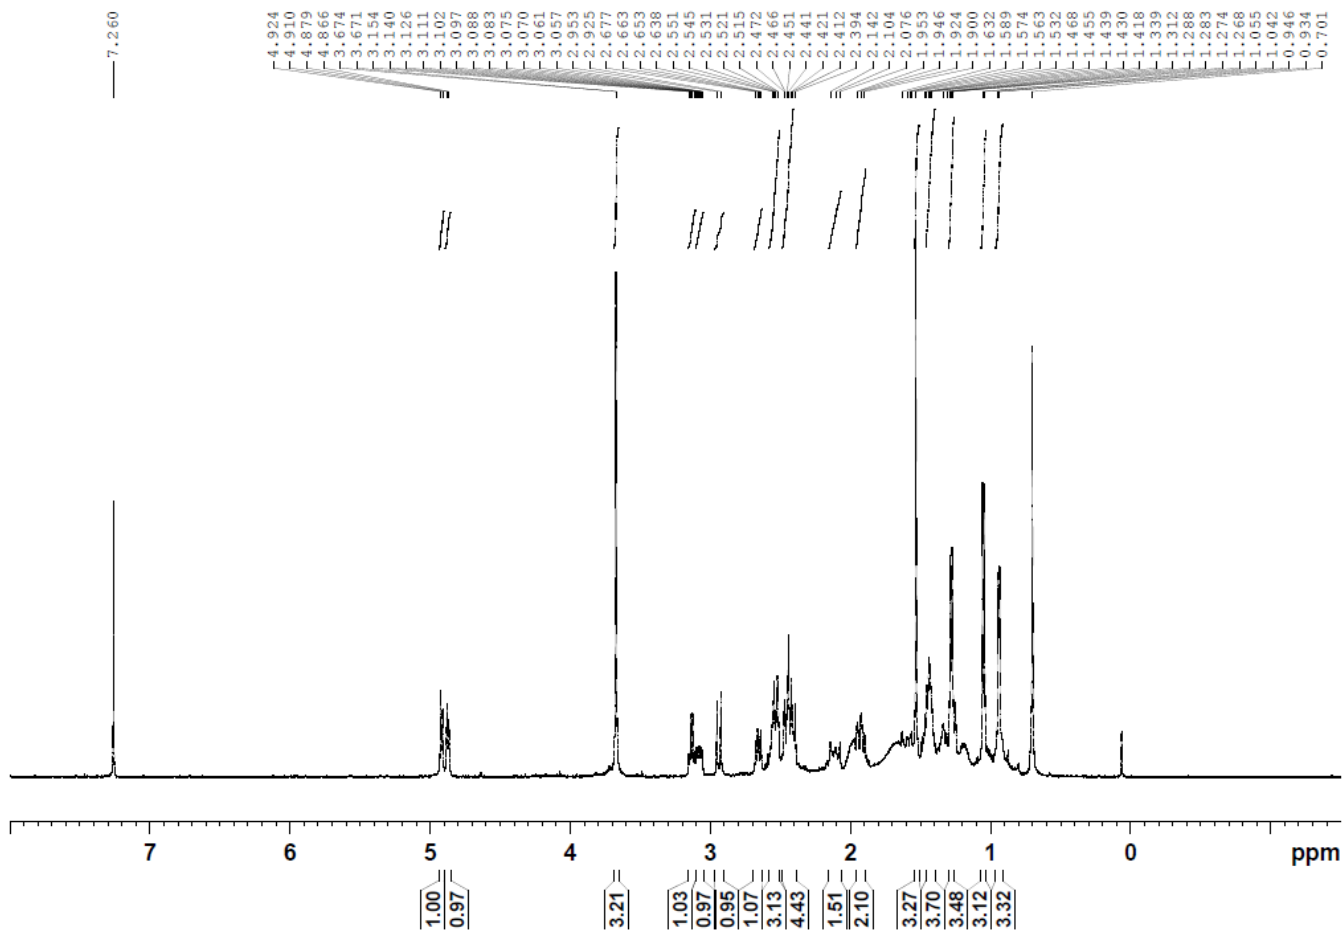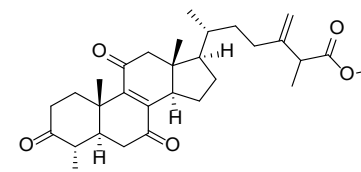

**Figure S4**  $^{13}\text{C}$  NMR (125 MHz,  $\text{CDCl}_3$ ) spectrum of zhankuic acid A methyl ester. (8)

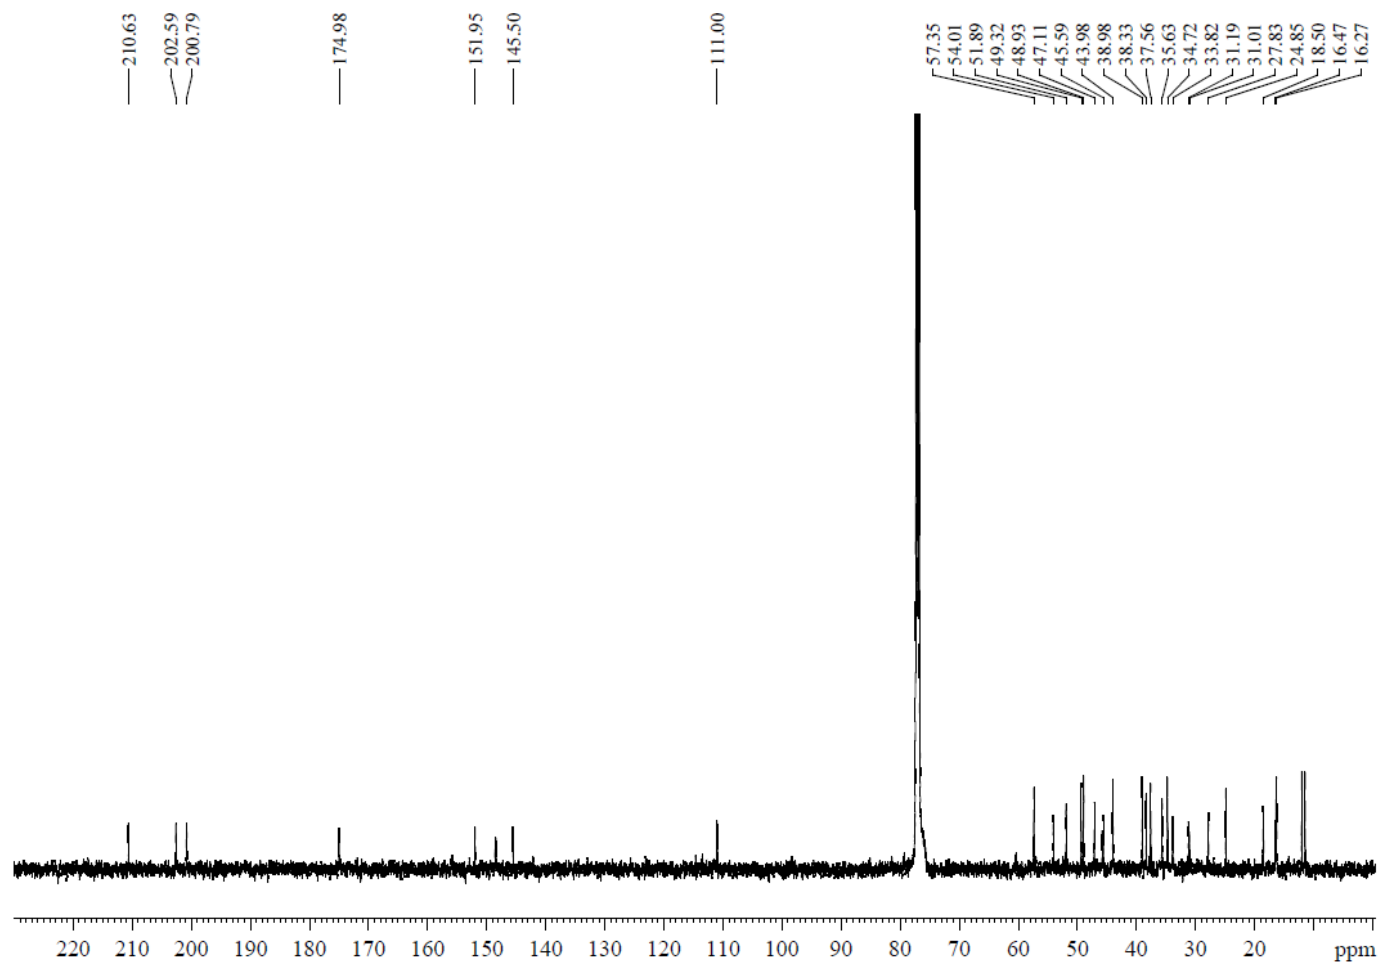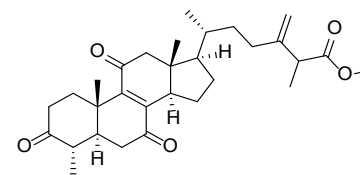



Figure S5  $^1\text{H}$  NMR (500 MHz,  $\text{CDCl}_3$ ) spectrum of methyl 7 $\alpha$ , 12 $\alpha$ -dihydroxy-3,11-dioxo-4 $\alpha$ -methylergosta-8,24(28)-dien-26-oate. (10)

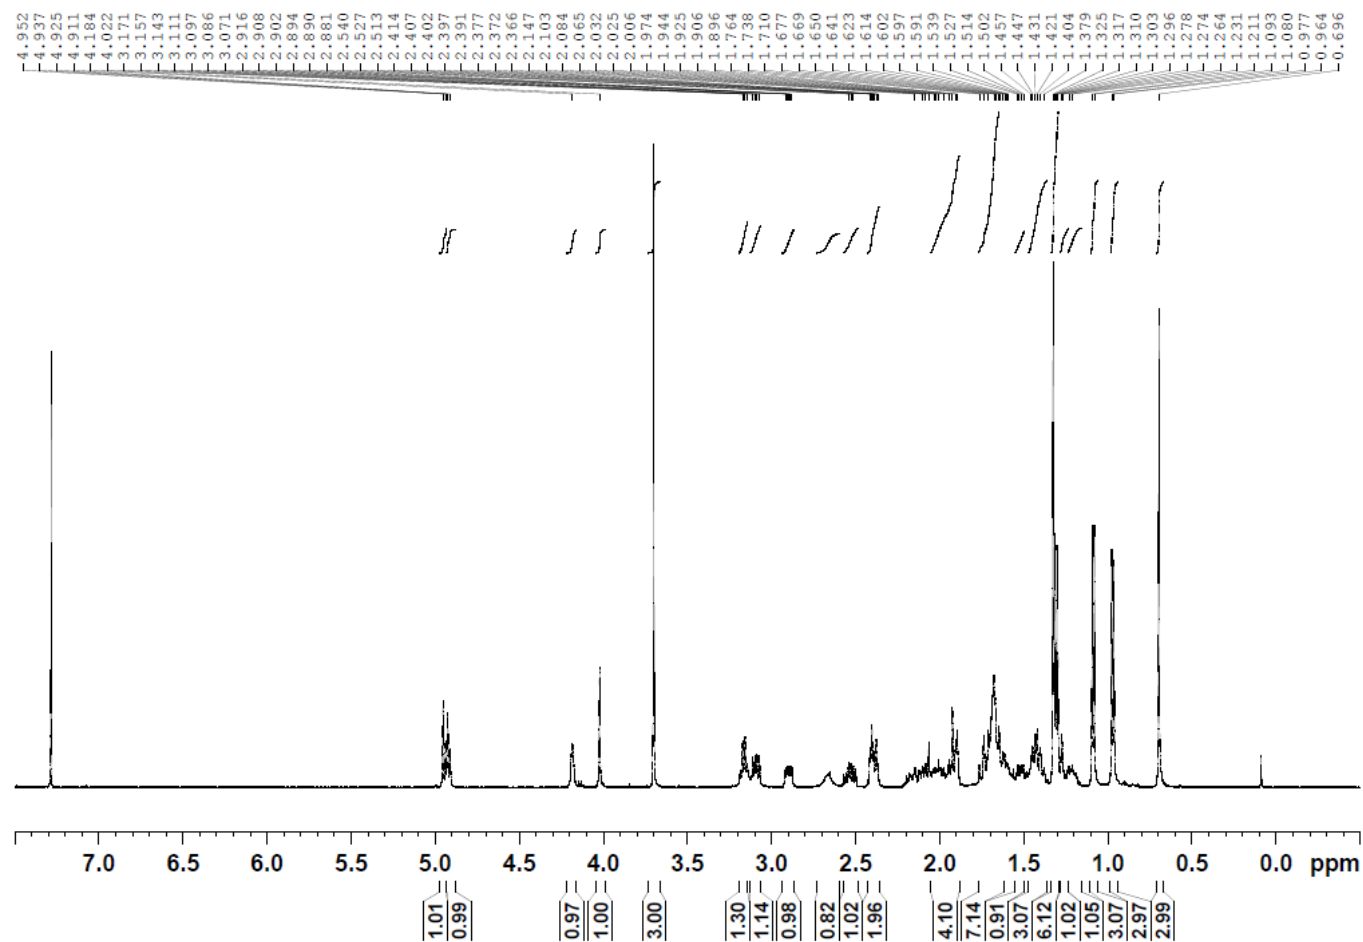

Figure S6  $^{13}\text{C}$  NMR (125 MHz,  $\text{CDCl}_3$ ) spectrum of methyl 7 $\alpha$ , 12 $\alpha$ -dihydroxy-3,11-dioxo-4 $\alpha$ -methylergosta-8,24(28)-dien-26-oate. (10)

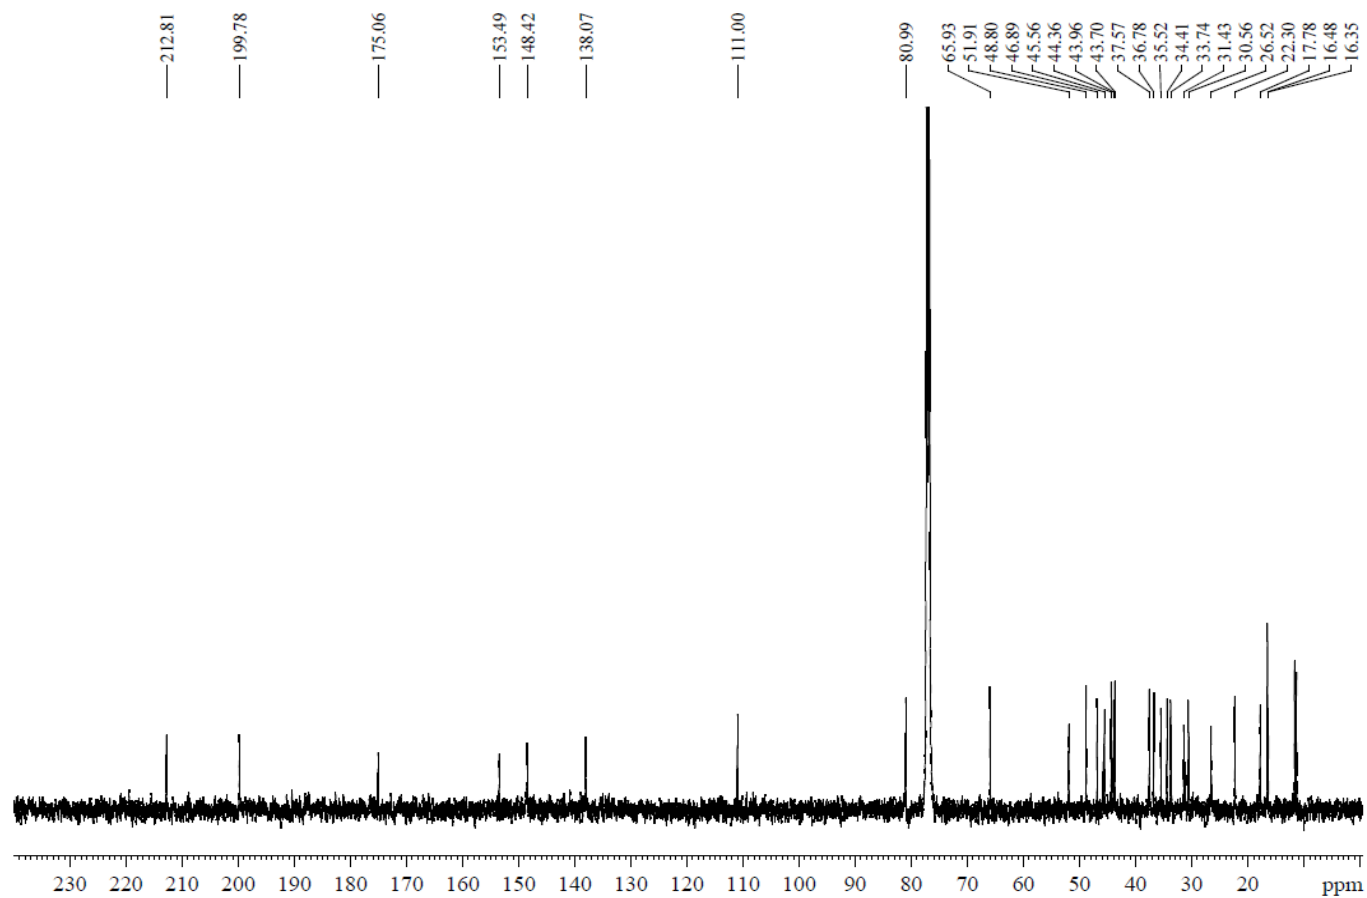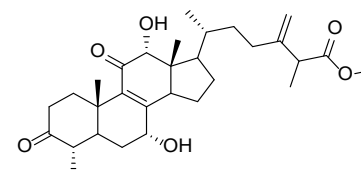

Figure S7  $^1\text{H}$  NMR (500 MHz,  $\text{CDCl}_3$ ) spectrum of methyl-7 $\beta$ -hydroxy-3,11-dioxo-4 $\alpha$ -methylergosta-8,24(28)-dien-26-oate. (12)

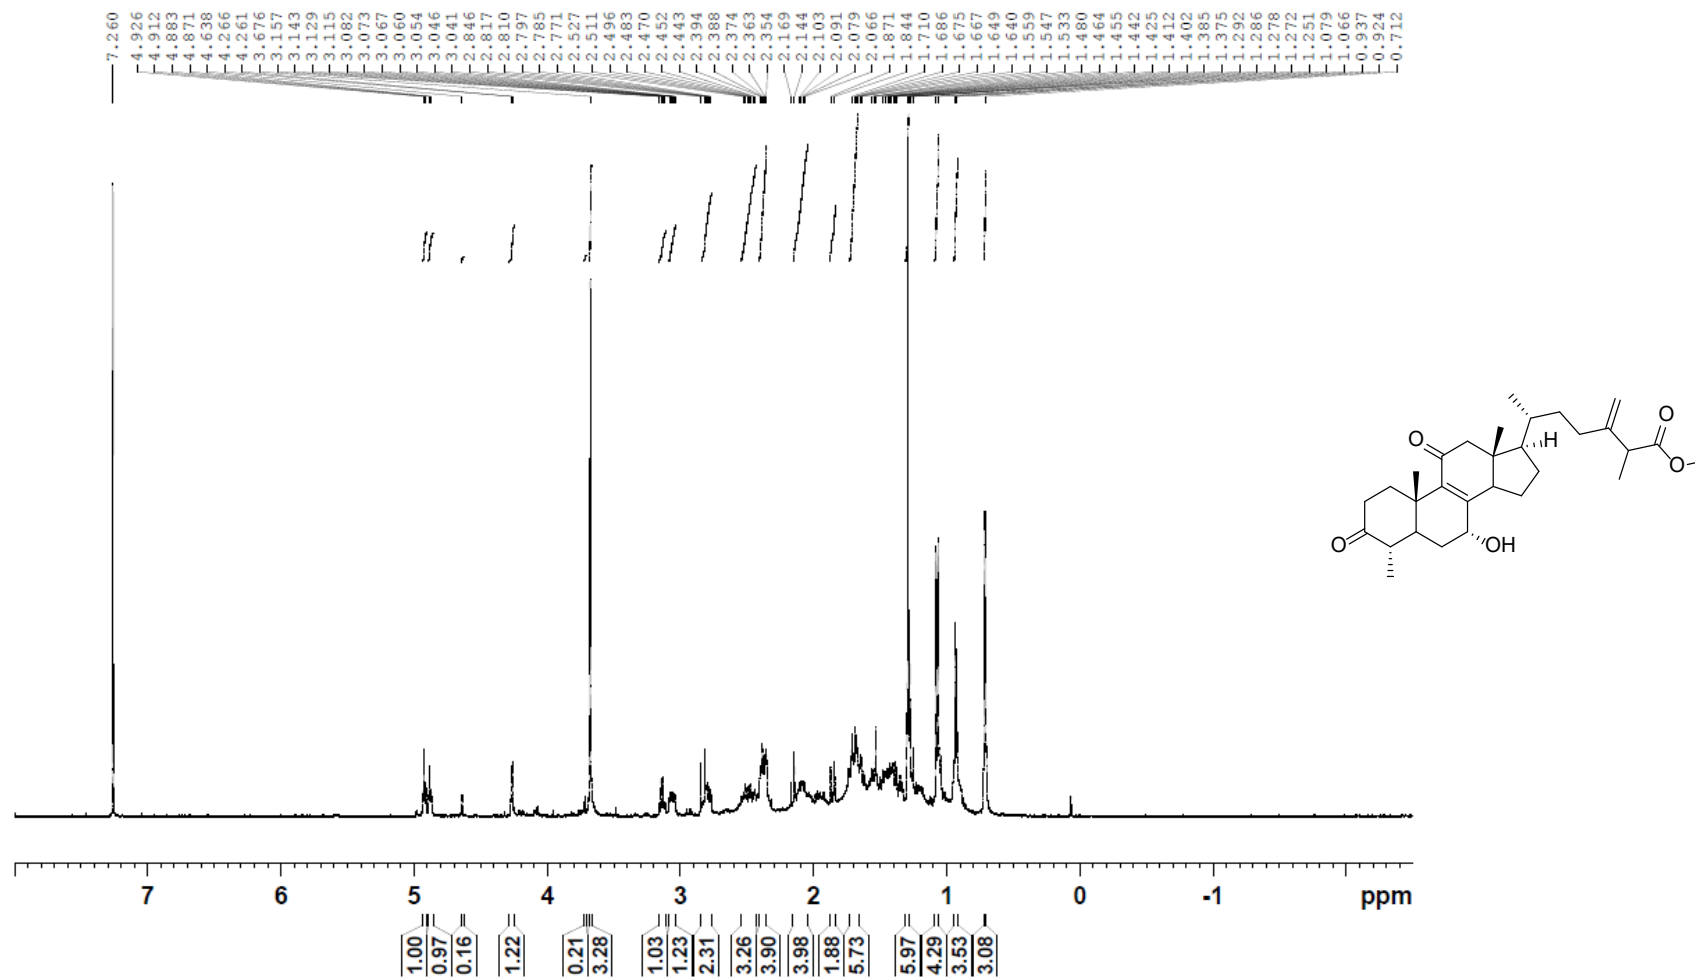

Figure S8  $^{13}\text{C}$  NMR (125 MHz,  $\text{CDCl}_3$ ) spectrum of methyl-7 $\beta$ -hydroxy-3,11-dioxo-4 $\alpha$ -methylergosta-8,24(28)-dien-26-oate. (12)

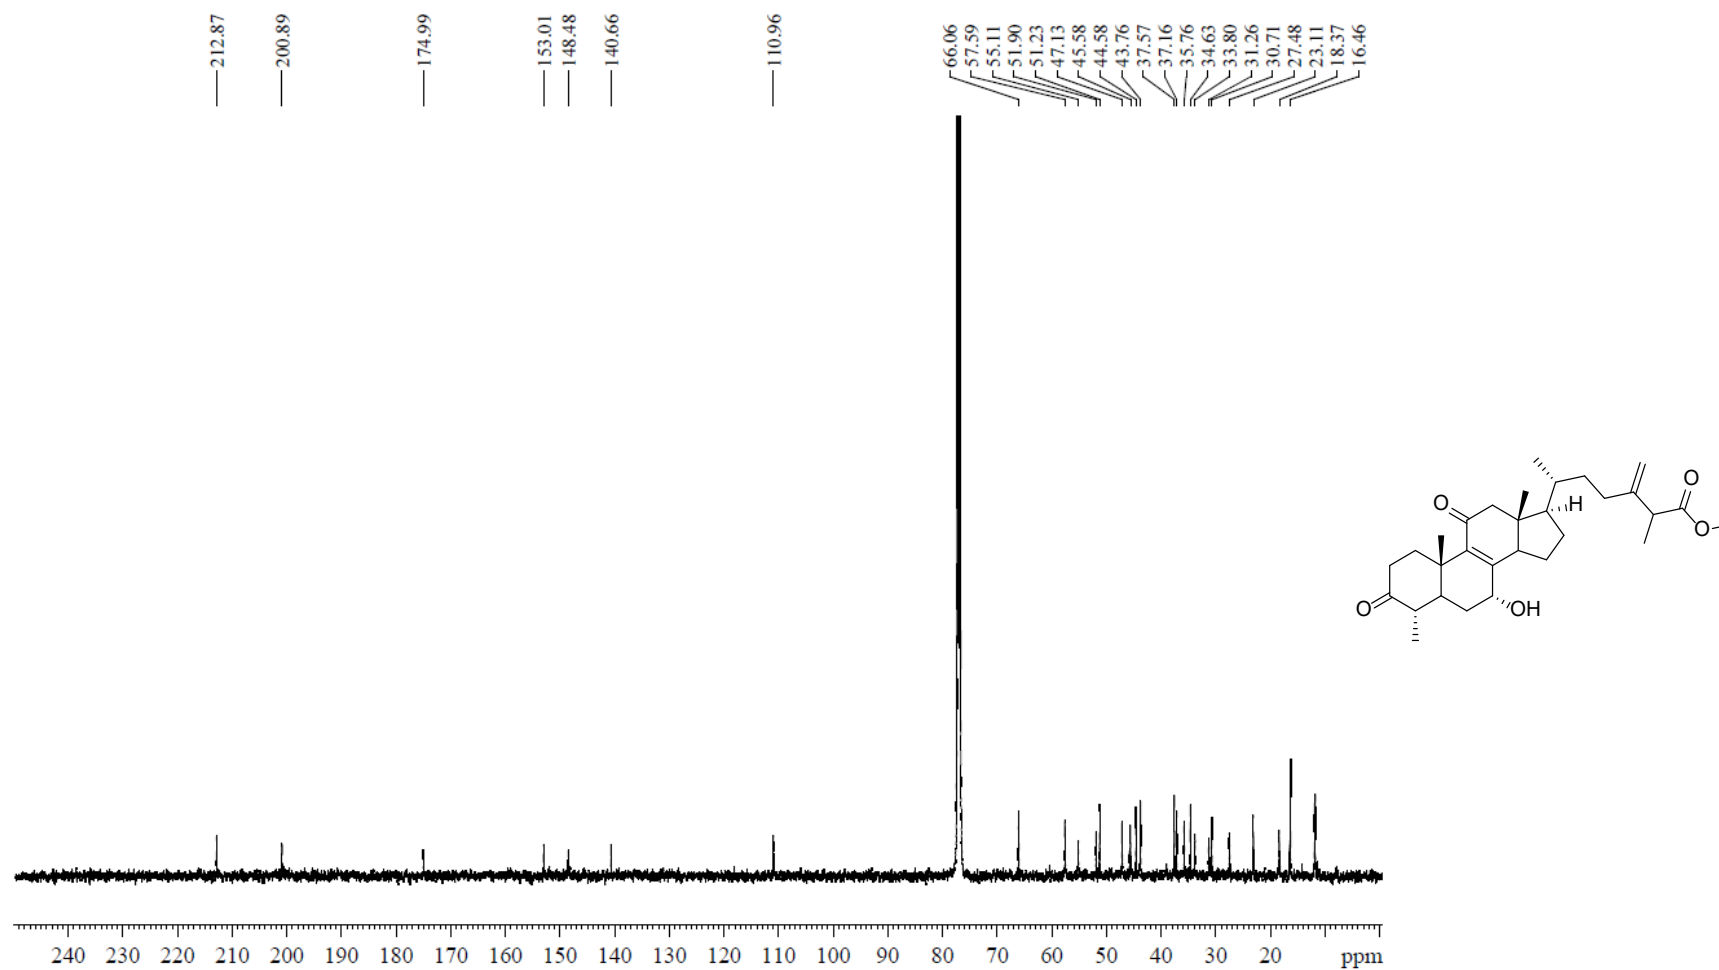

Figure S9  $^1\text{H}$  NMR (500 MHz, acetone- $d_6$ ) spectrum of methyl 3 $\alpha$ ,4 $\beta$ ,7 $\beta$ -trihydroxyergosta-8,24(28)-dien-11-on-26-oate (methyl antcamphorol D, 14).

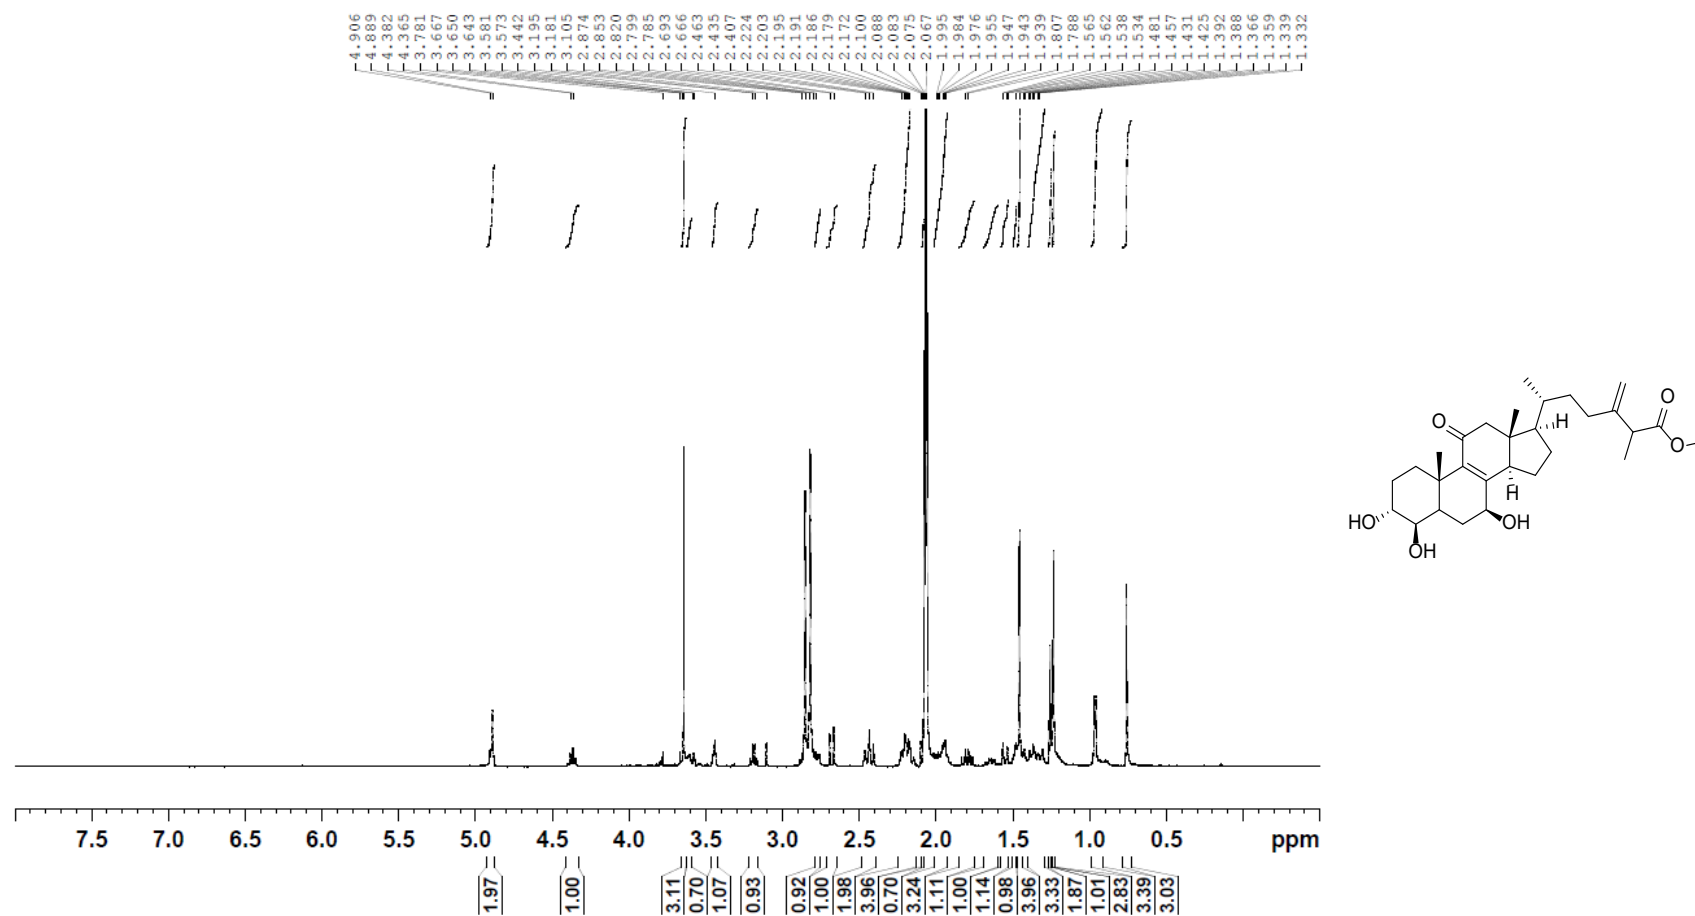

Figure S10  $^{13}\text{C}$  NMR (125 MHz, acetone- $\text{d}_6$ ) spectrum of methyl 3 $\alpha$ ,4 $\beta$ ,7 $\beta$ -trihydroxyergosta-8,24(28)-dien-11-on-26-oate (methyl antcamphorol D, 14).

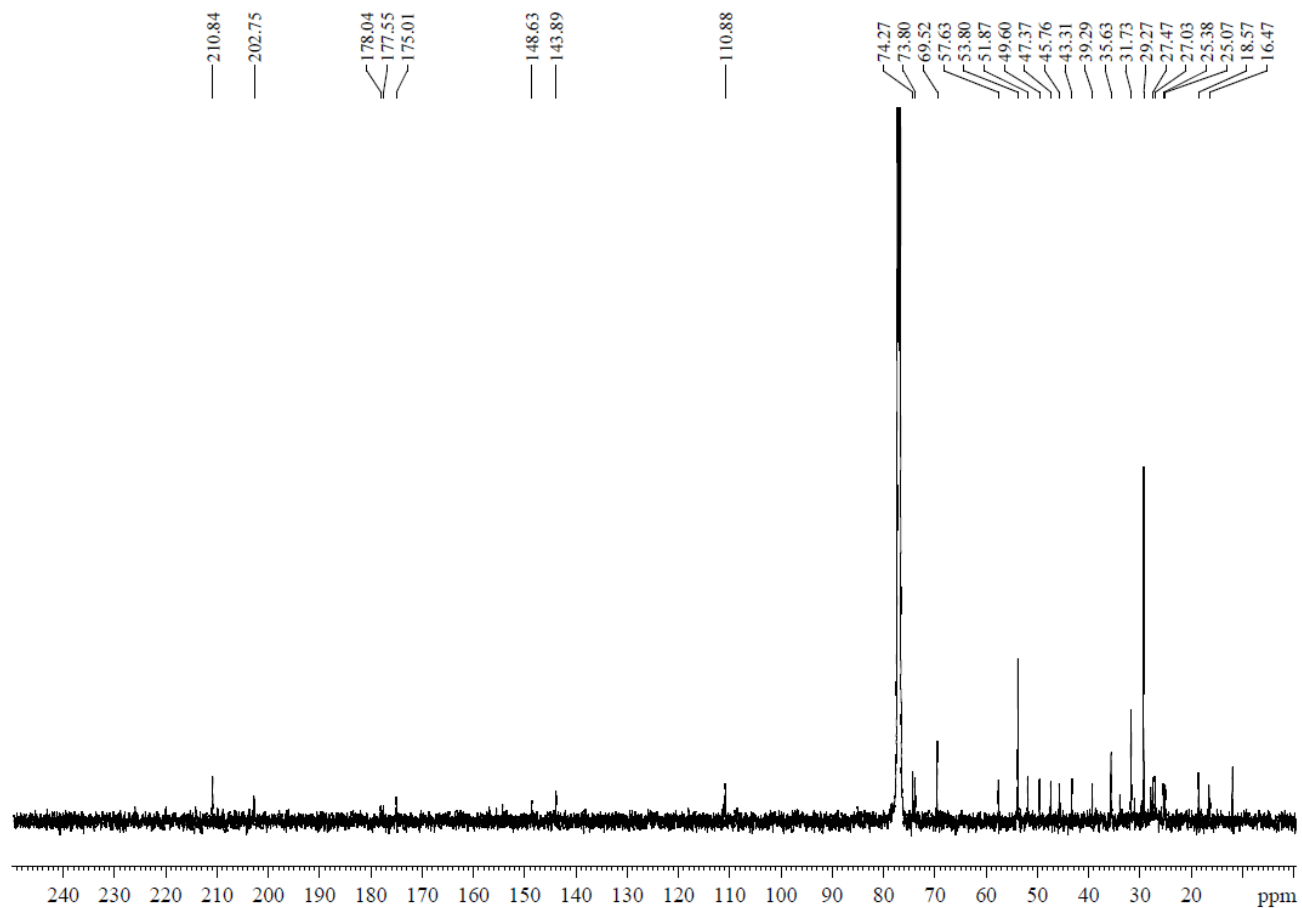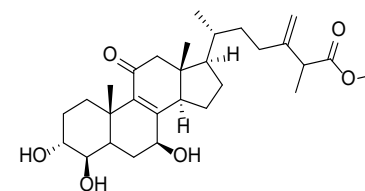

Figure S11  $^1\text{H}$  NMR (500 MHz,  $\text{CDCl}_3$ ) spectrum of methyl 3 $\alpha$ ,12 $\alpha$ -dihydroxy 4 $\alpha$ -methylergosta-8,24(28)-diene-7,11-dione-26-oate (methyl antcinate H, 16).

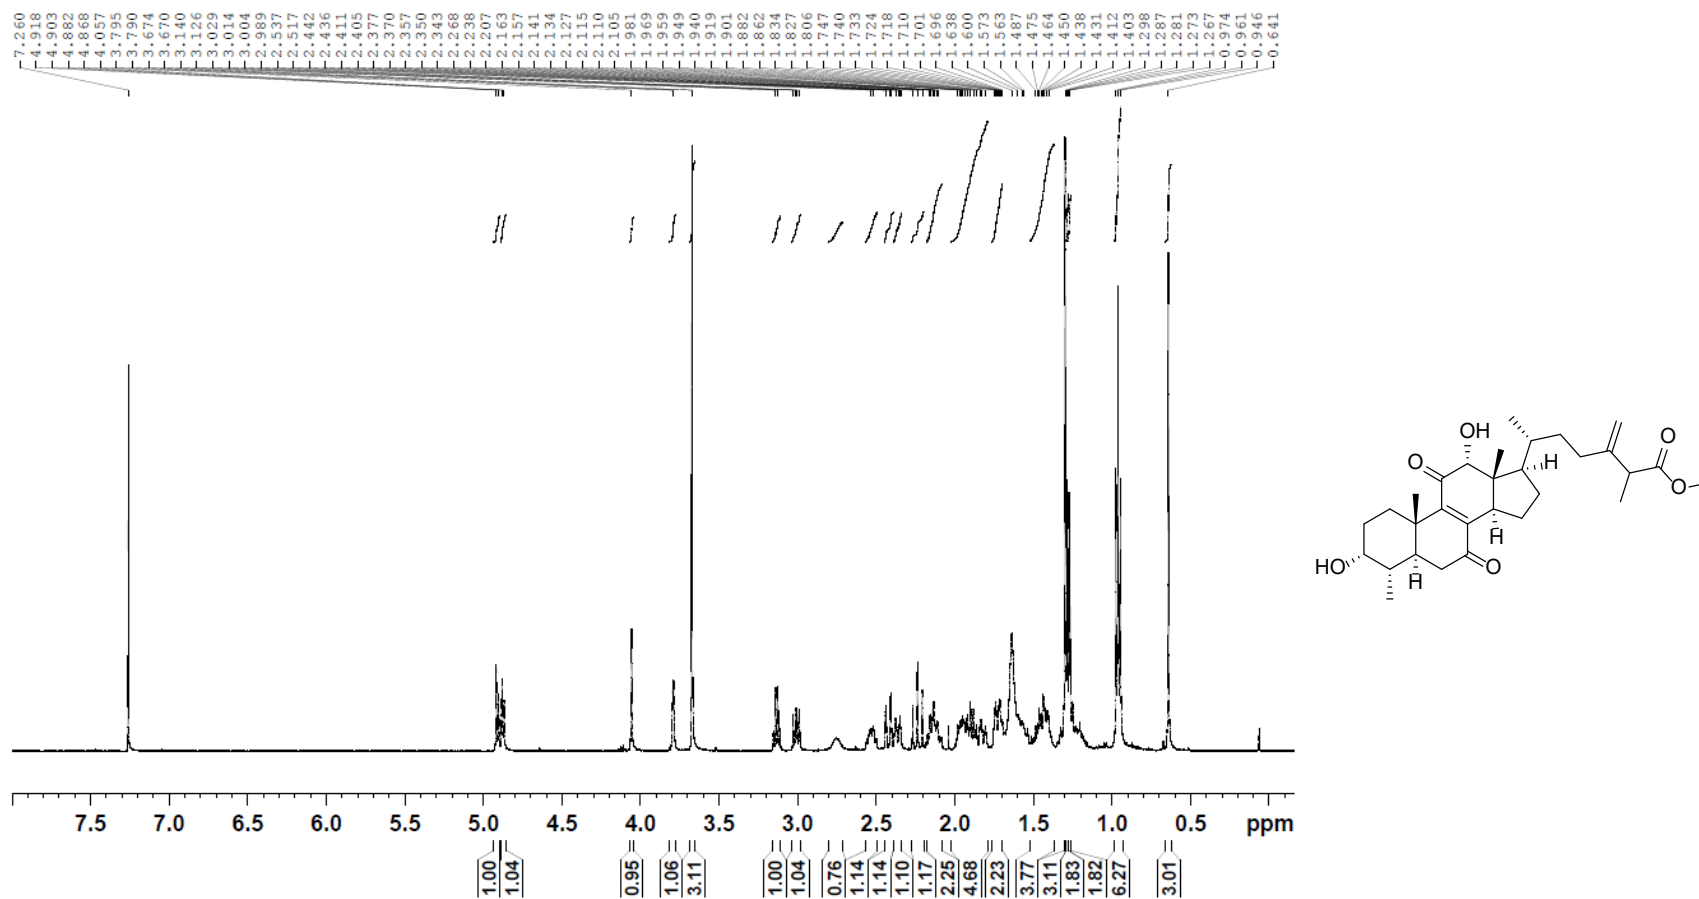

Figure S12  $^{13}\text{C}$  NMR (125 MHz,  $\text{CDCl}_3$ ) spectrum of methyl 3 $\alpha$ ,12 $\alpha$ -dihydroxy 4 $\alpha$ -methylergosta-8,24(28)-diene-7,11-dione-26-oate (methyl antcinate H, 16)

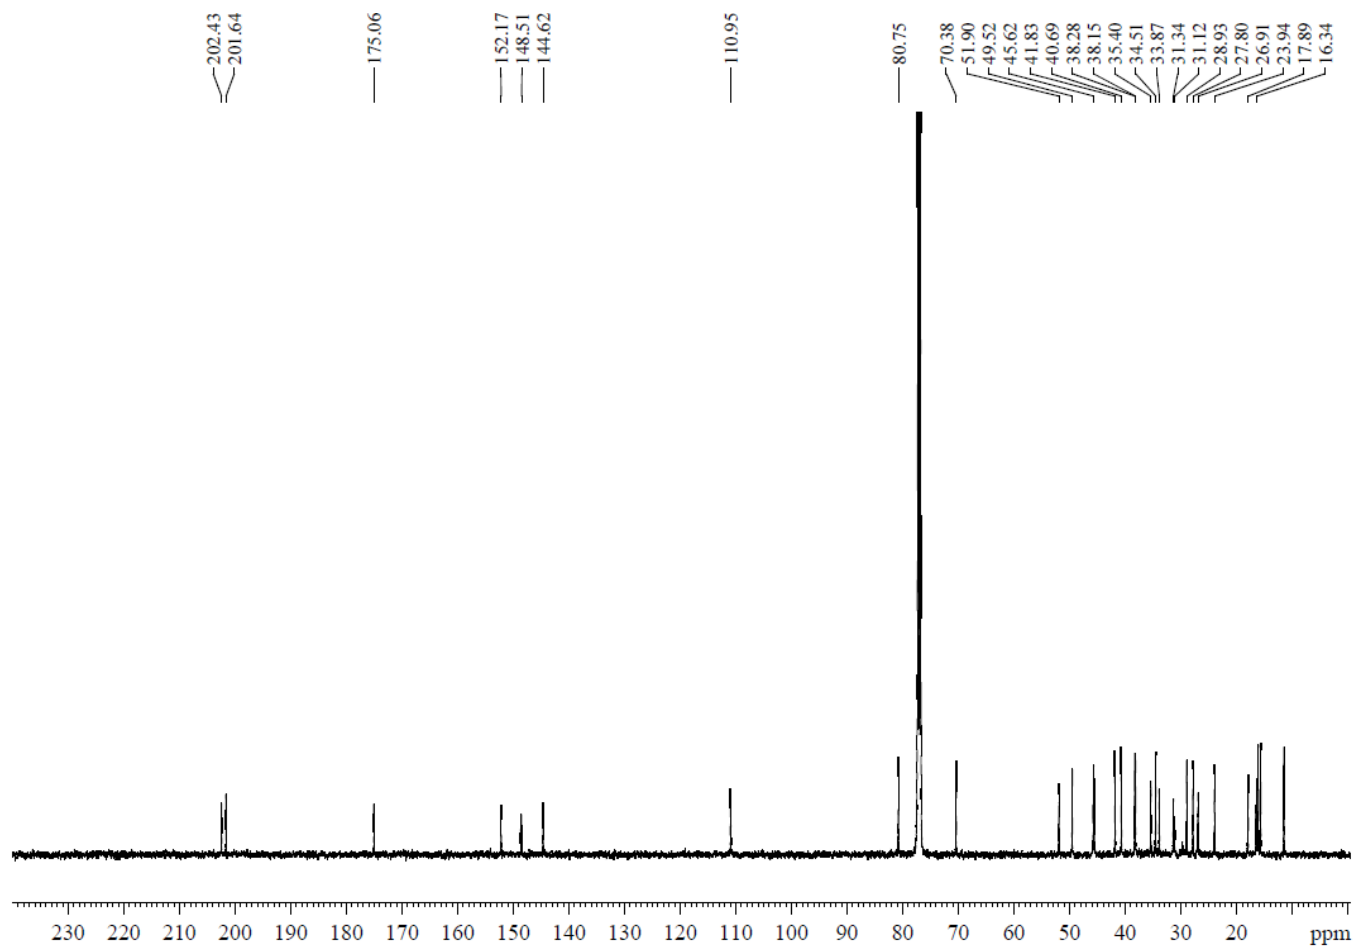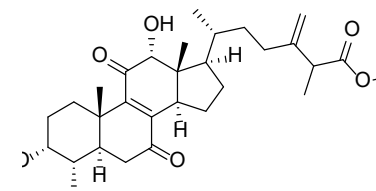



Figure S13  $^1\text{H}$  NMR (500 MHz,  $\text{CDCl}_3$ ) spectrum of zhankuic acid methyl ester C 3-O-formate. (18)

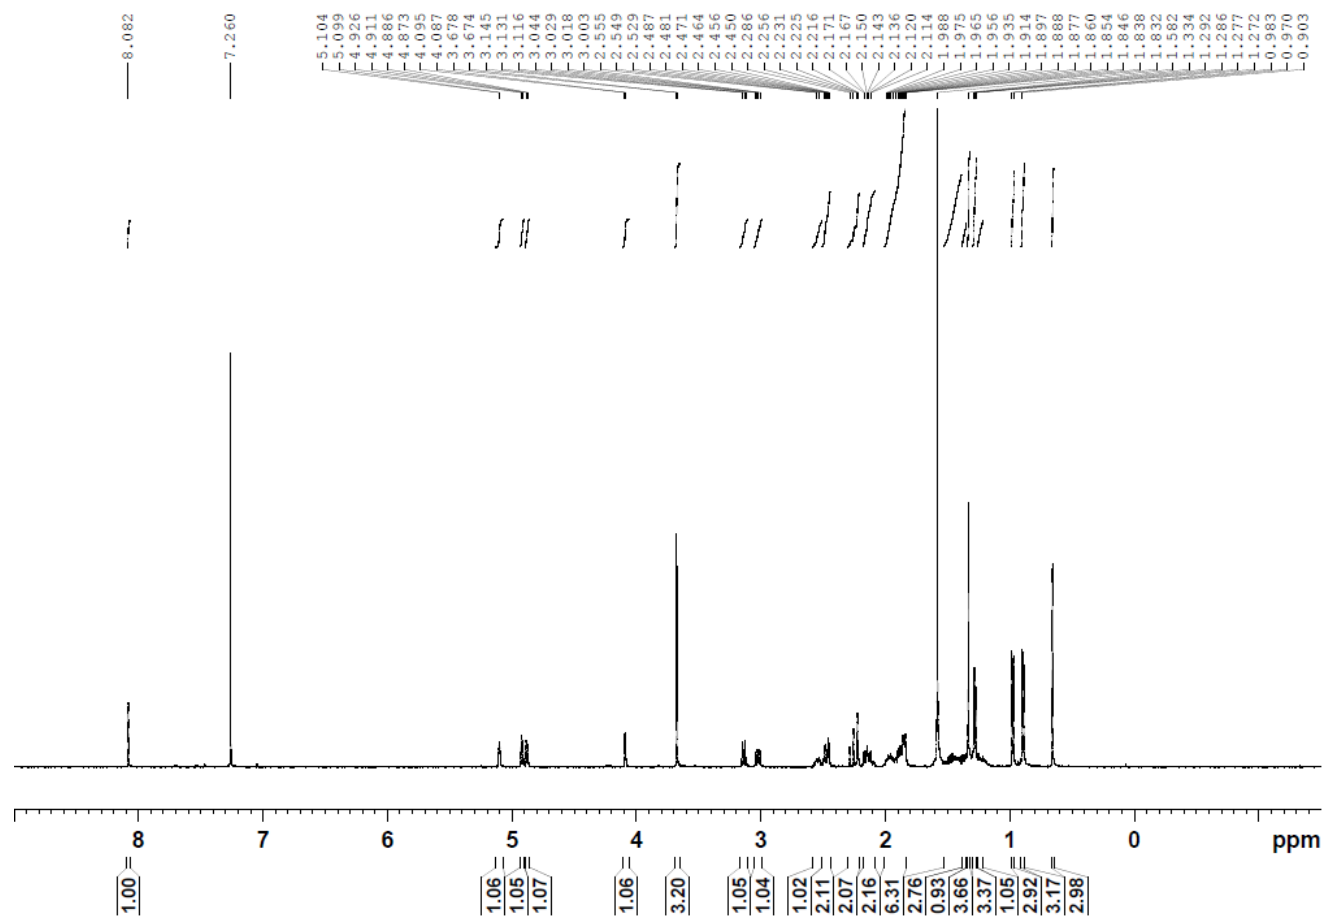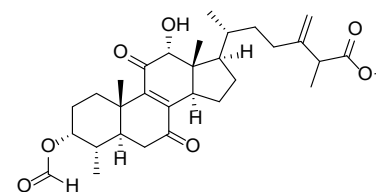

Figure S14  $^{13}\text{C}$  NMR (125 MHz,  $\text{CDCl}_3$ ) spectrum of zhankuic acid methyl ester C 3-O-formate. (18)

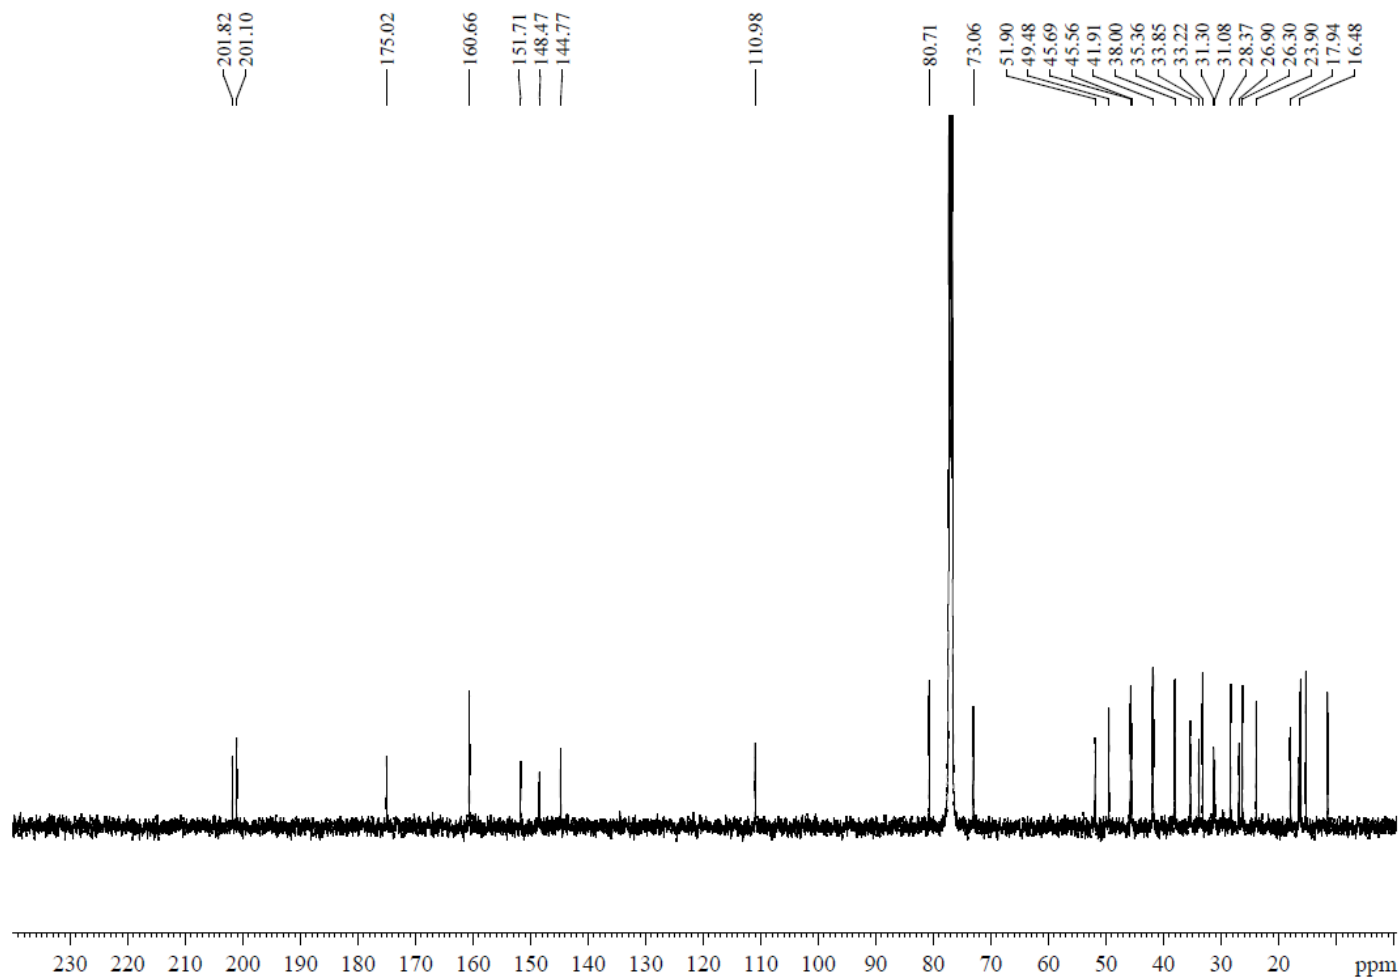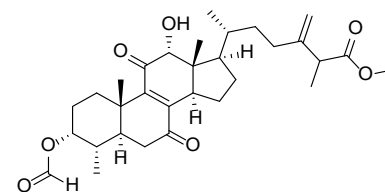

Figure S15  $^1\text{H}$  NMR (500 MHz,  $\text{CDCl}_3$ ) spectrum of methyl 3 $\alpha$ -hydroxy-7,11-dioxo-4 $\alpha$ -methylergosta-8,24(28)-dien-26-oate. (20)

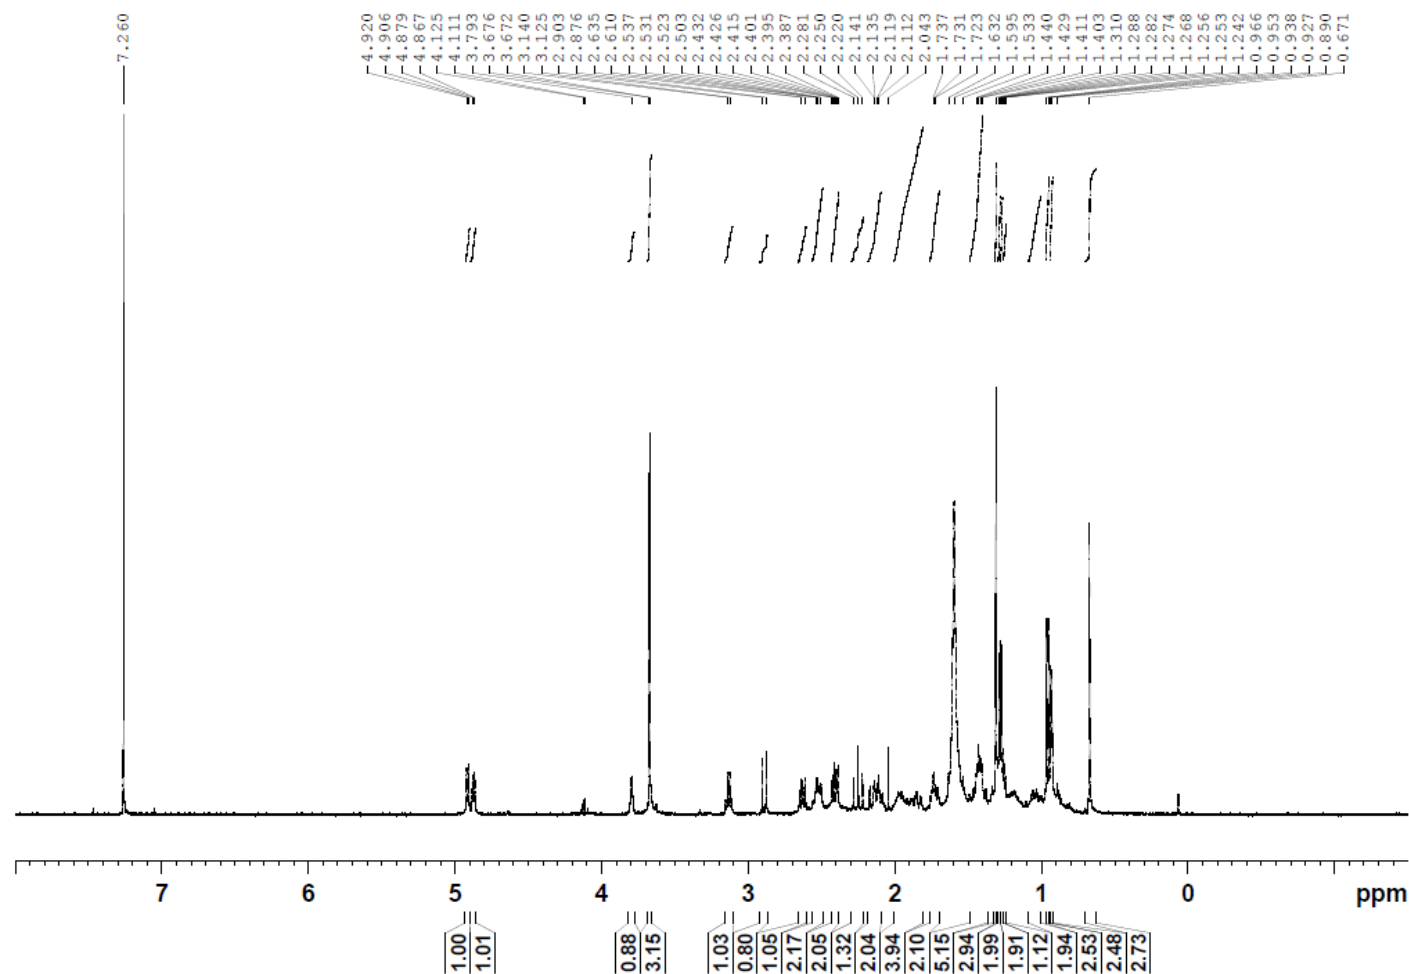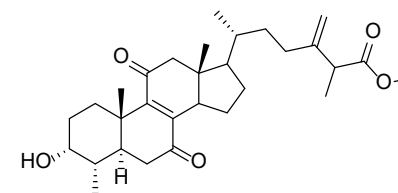

Figure S16  $^{13}\text{C}$  NMR (125 MHz,  $\text{CDCl}_3$ ) spectrum of methyl 3 $\alpha$ -hydroxy-7,11-dioxo-4 $\alpha$ -methylergosta-8,24(28)-dien-26-oate. (20)

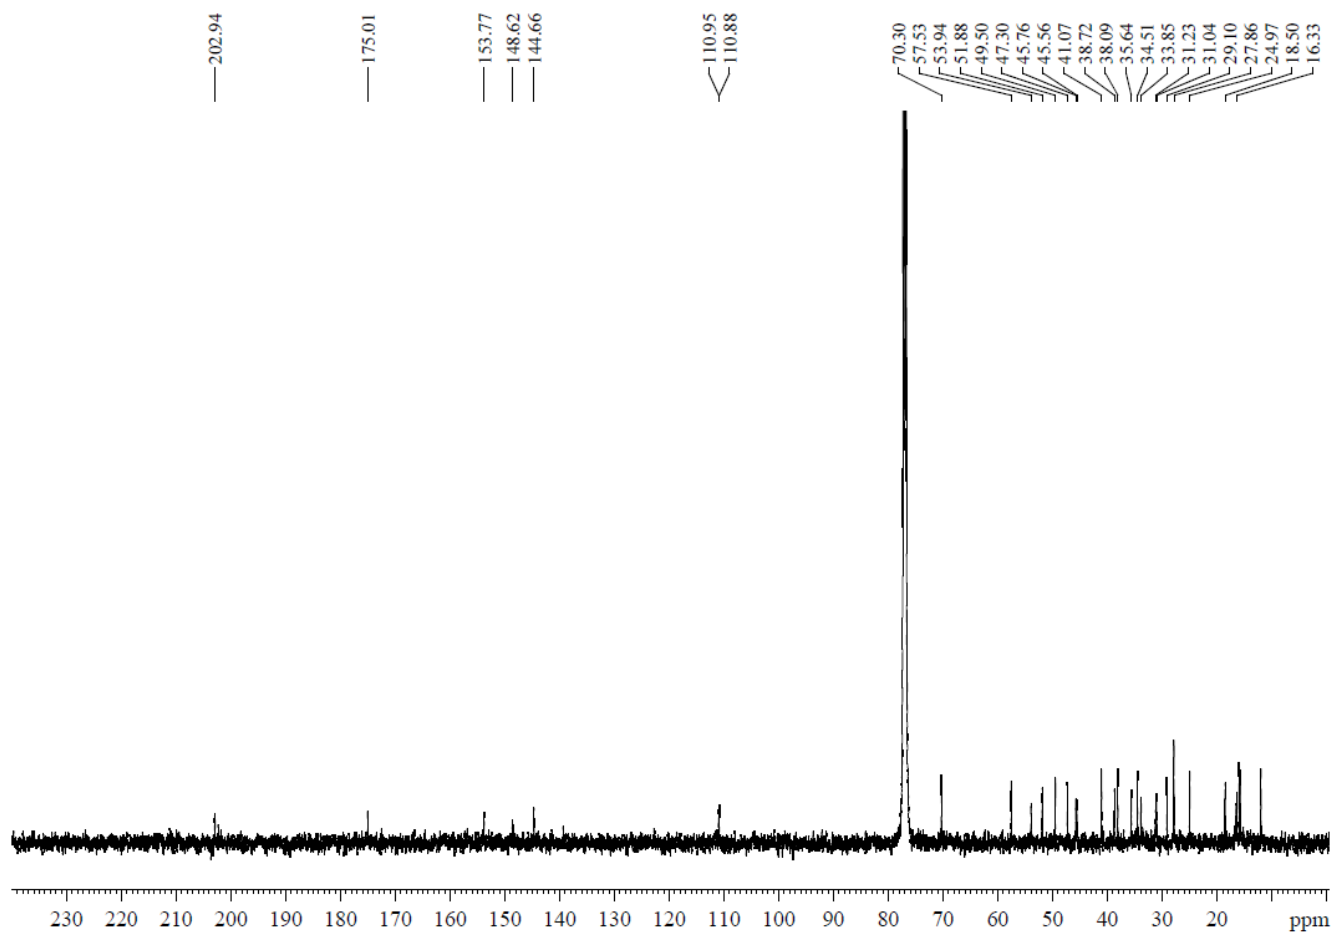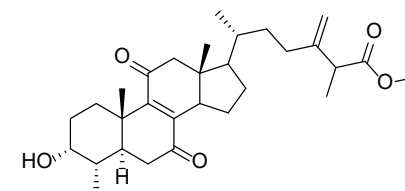

Figure S17  $^1\text{H}$  NMR (500 MHz,  $\text{CDCl}_3$ ) spectrum of methyl 7 $\beta$ -hydroxy-3,11-dioxo-4 $\alpha$ -methylergosta-8,24(28)-dien-26-oate. (22)

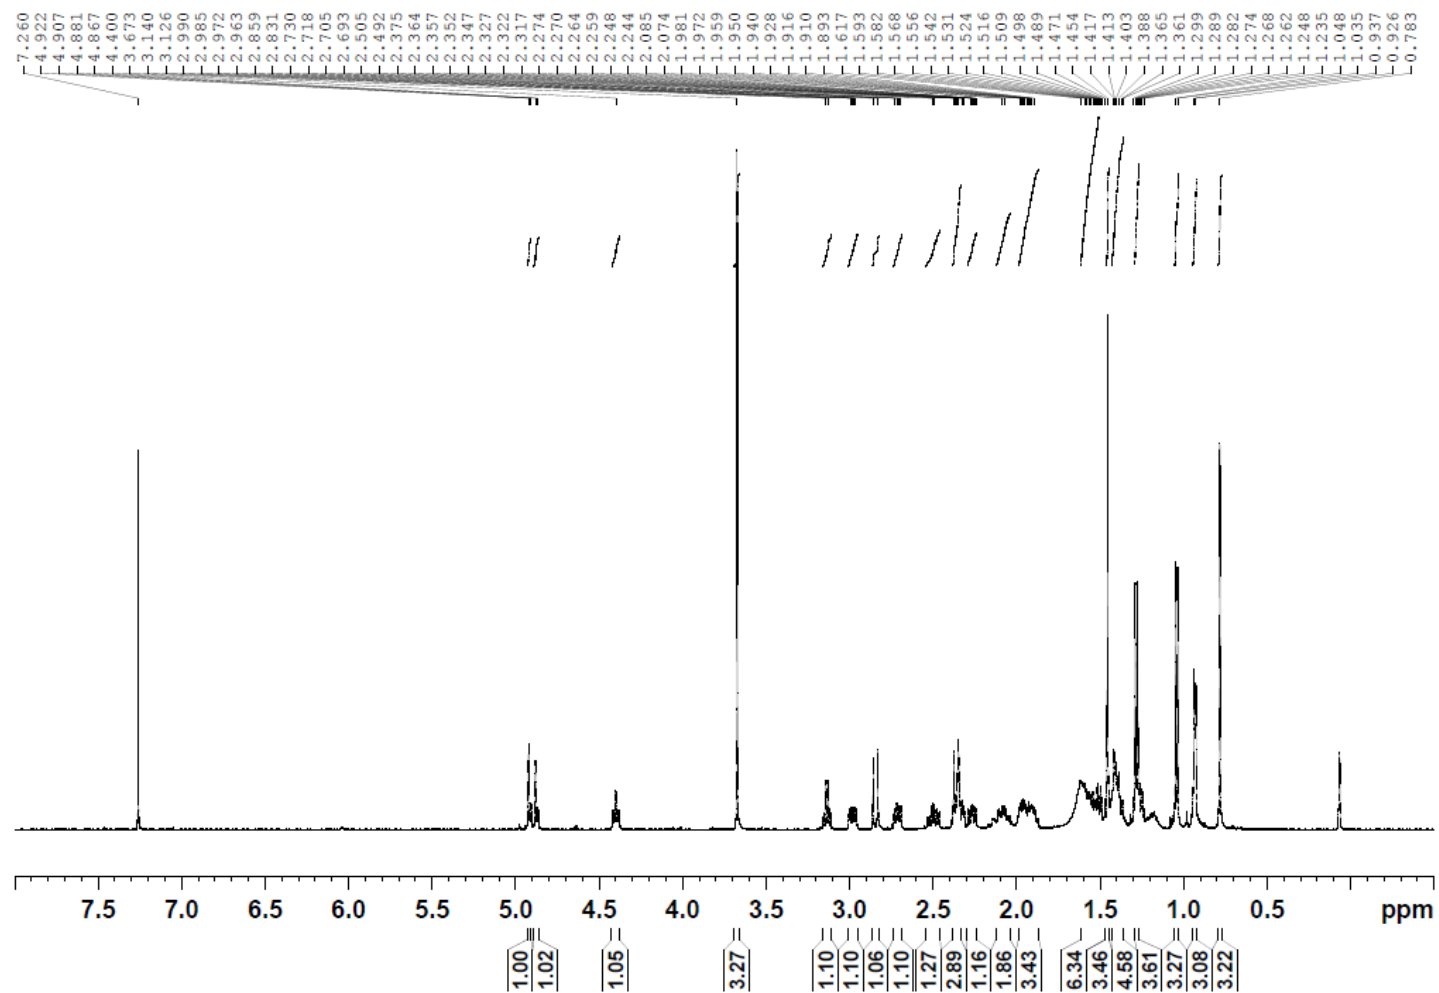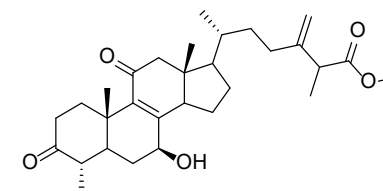

Figure S18  $^{13}\text{C}$  NMR (125 MHz,  $\text{CDCl}_3$ ) spectrum of methyl 7 $\beta$ -hydroxy-3,11-dioxo-4 $\alpha$ -methylergosta-8,24(28)-dien-26-oate. (22)

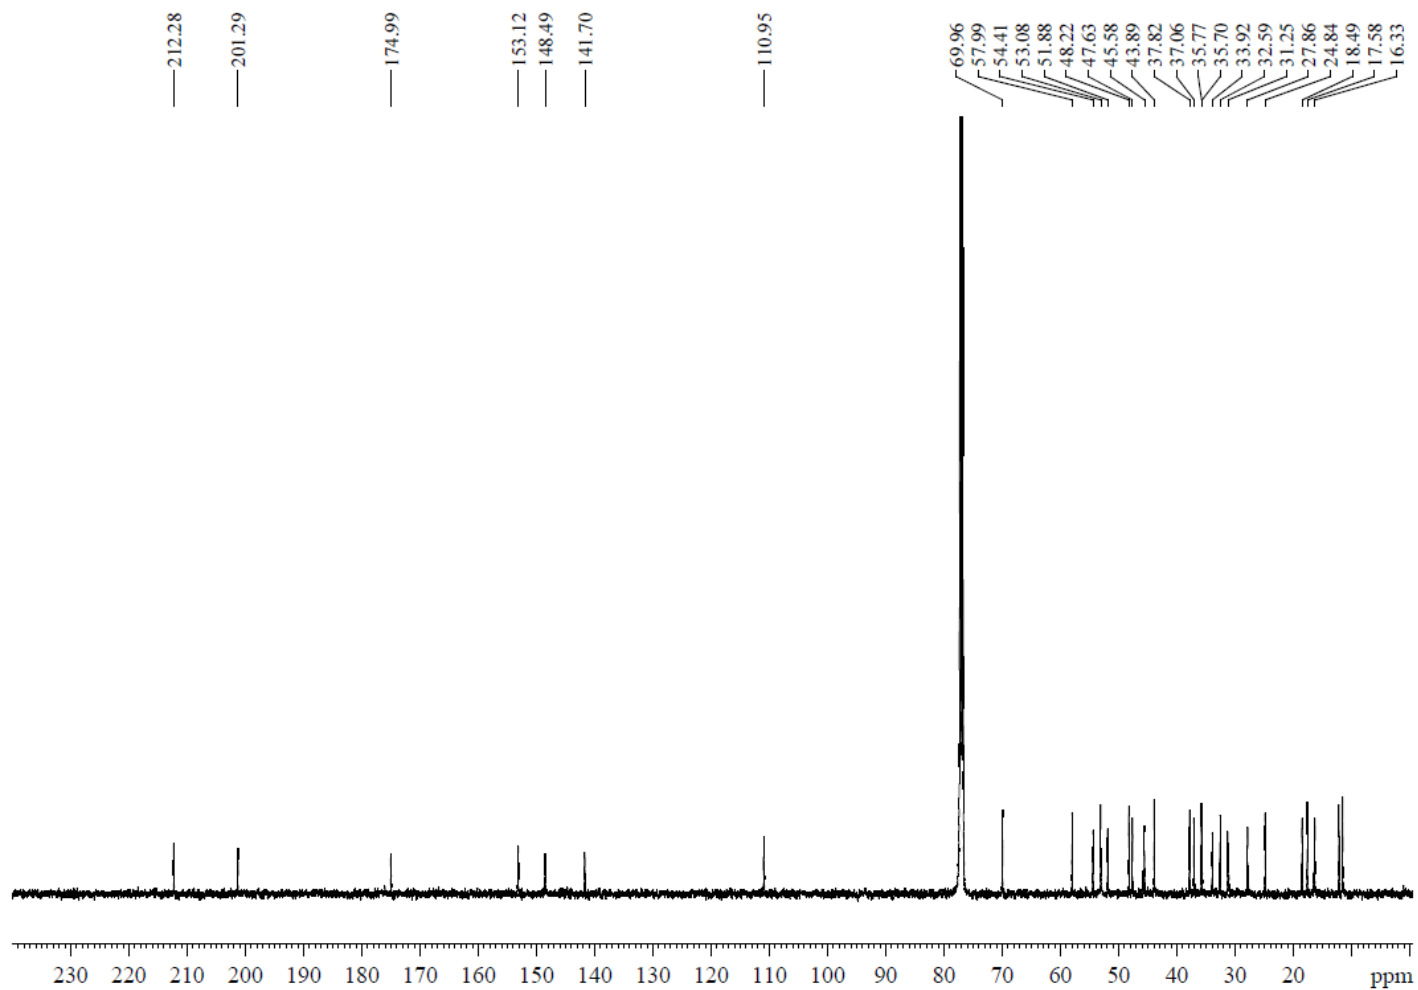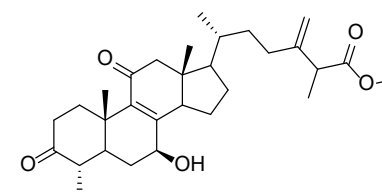

Figure S19  $^1\text{H}$  NMR (500 MHz,  $\text{CDCl}_3$ ) spectrum of methyl 4 $\alpha$ -methylergosta-8,24(28)-diene-3,11-dione-26-oate. (24)

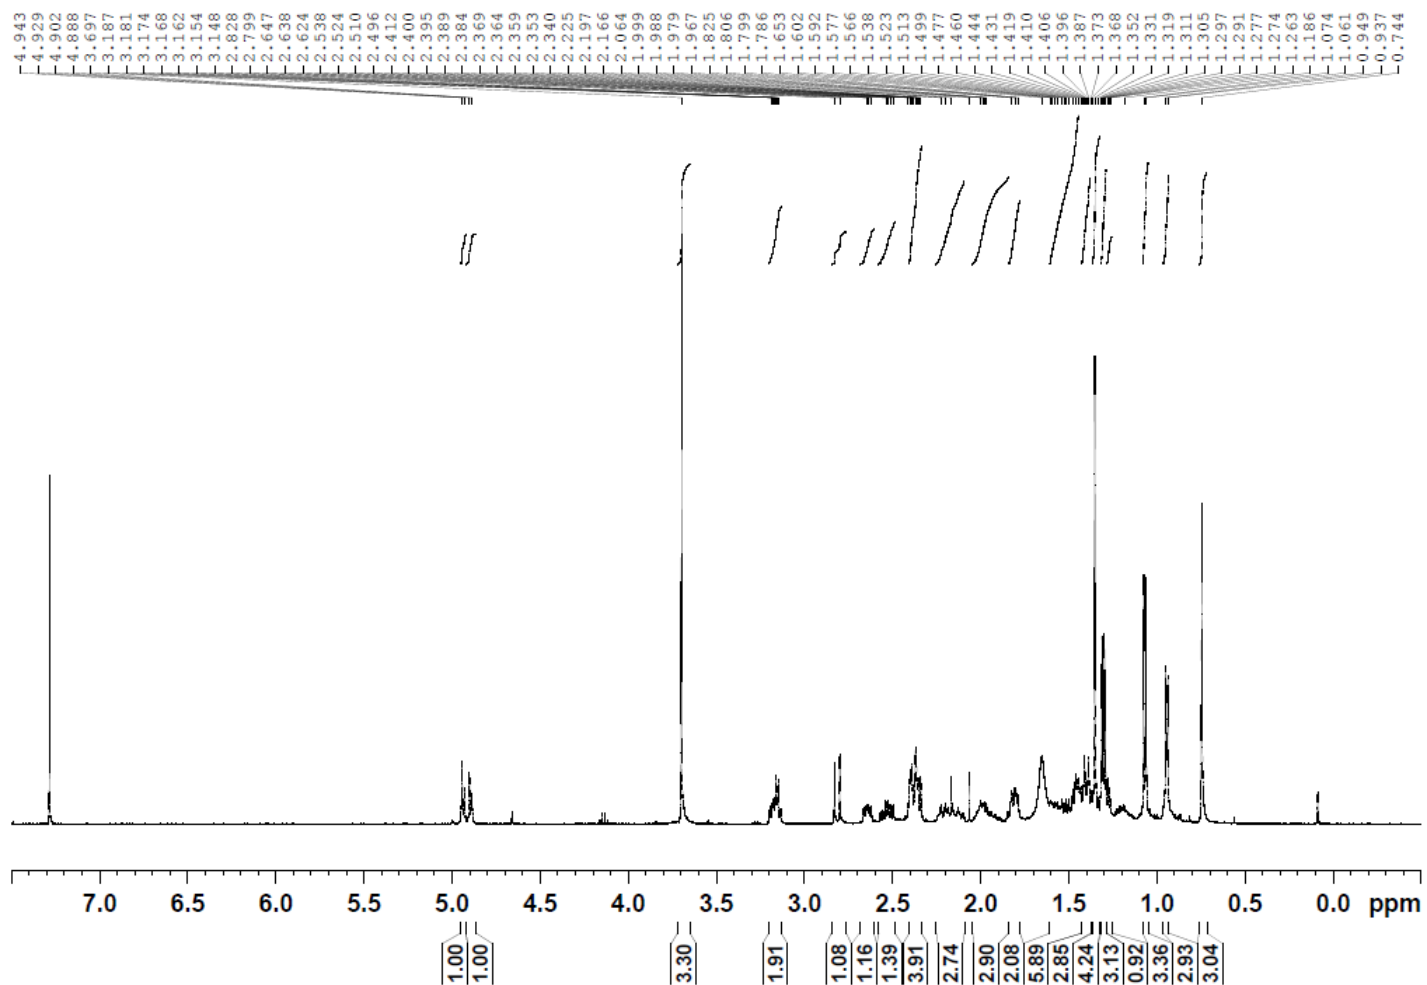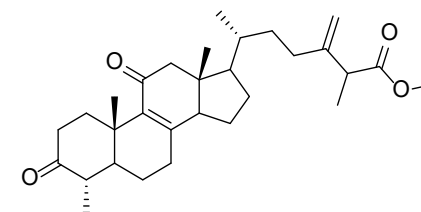

Figure S20  $^{13}\text{C}$  NMR (125 MHz,  $\text{CDCl}_3$ ) spectrum of methyl 4 $\alpha$ -methylergosta-8,24(28)-diene-3,11-dione-26-oate. (24)

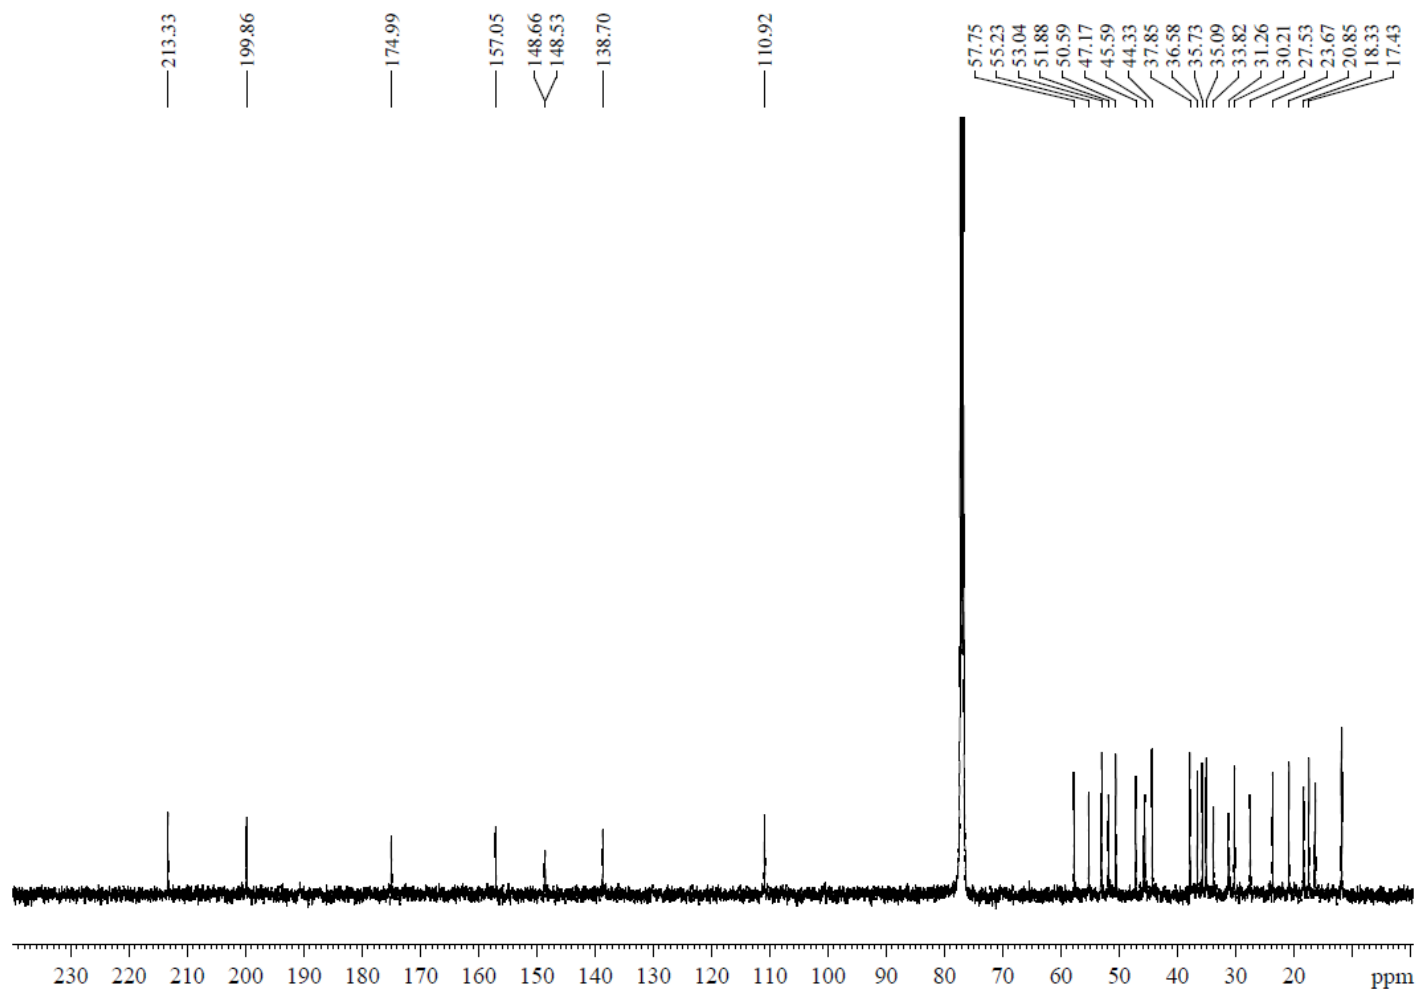



Figure S21  $^1\text{H}$  NMR (500 MHz,  $\text{CDCl}_3$ ) spectrum of methyl 3 $\alpha$ ,7 $\beta$ -dihydroxy-4 $\alpha$ -methylergosta-8,24(28)-dien-11-on-26-oate. (26)

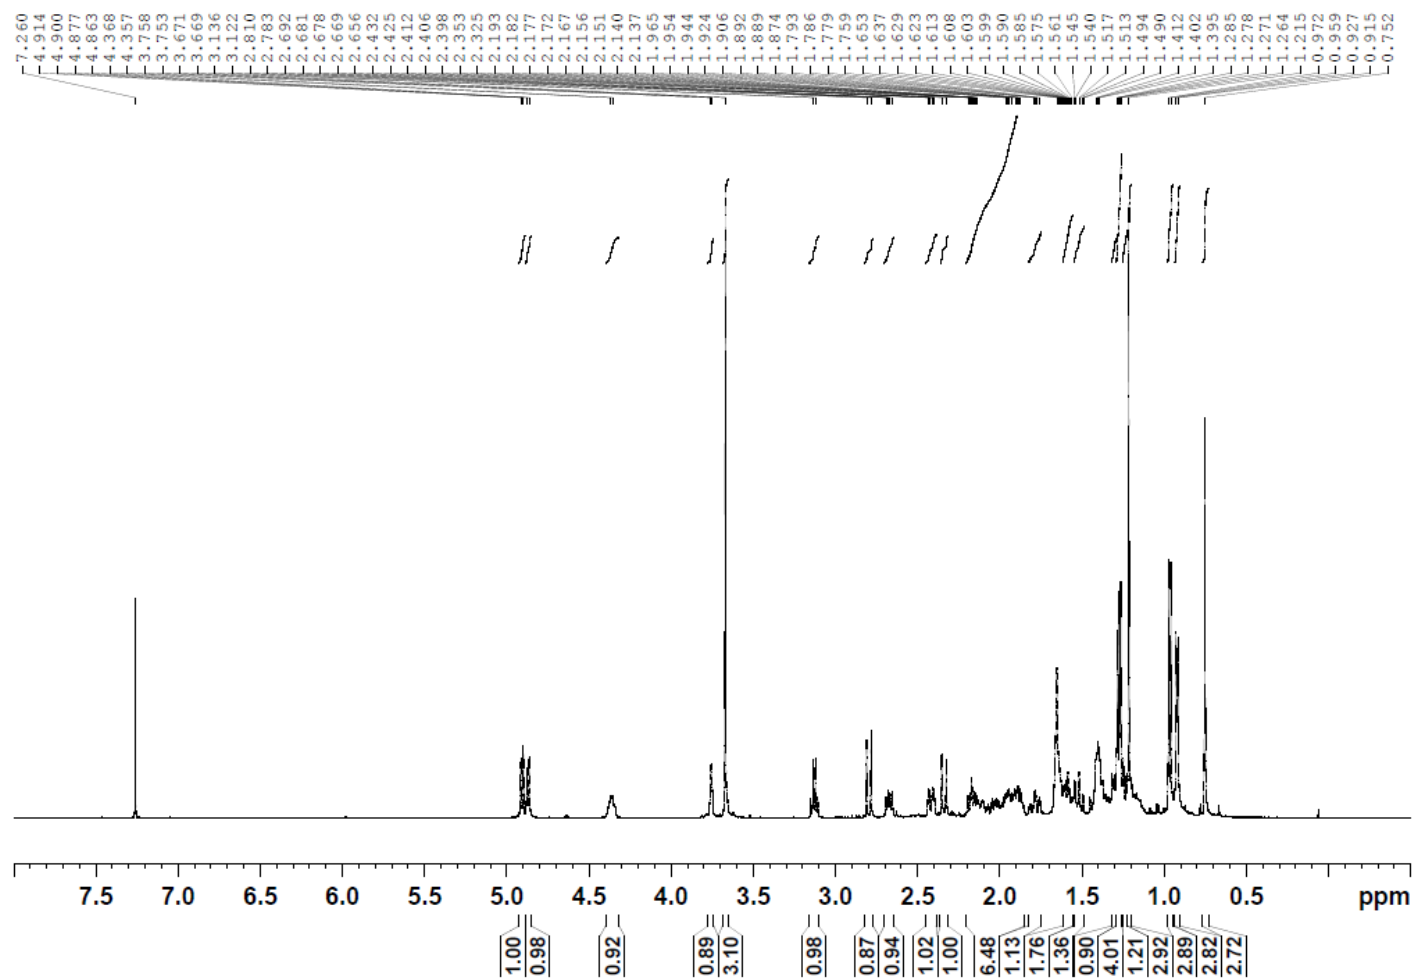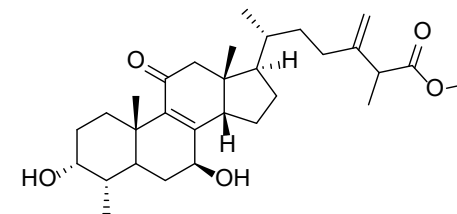

Figure S22  $^{13}\text{C}$  NMR (125 MHz,  $\text{CDCl}_3$ ) spectrum of methyl 3 $\alpha$ ,7 $\beta$ -dihydroxy-4 $\alpha$ -methylergosta-8,24(28)-dien-11-on-26-oate. (26)

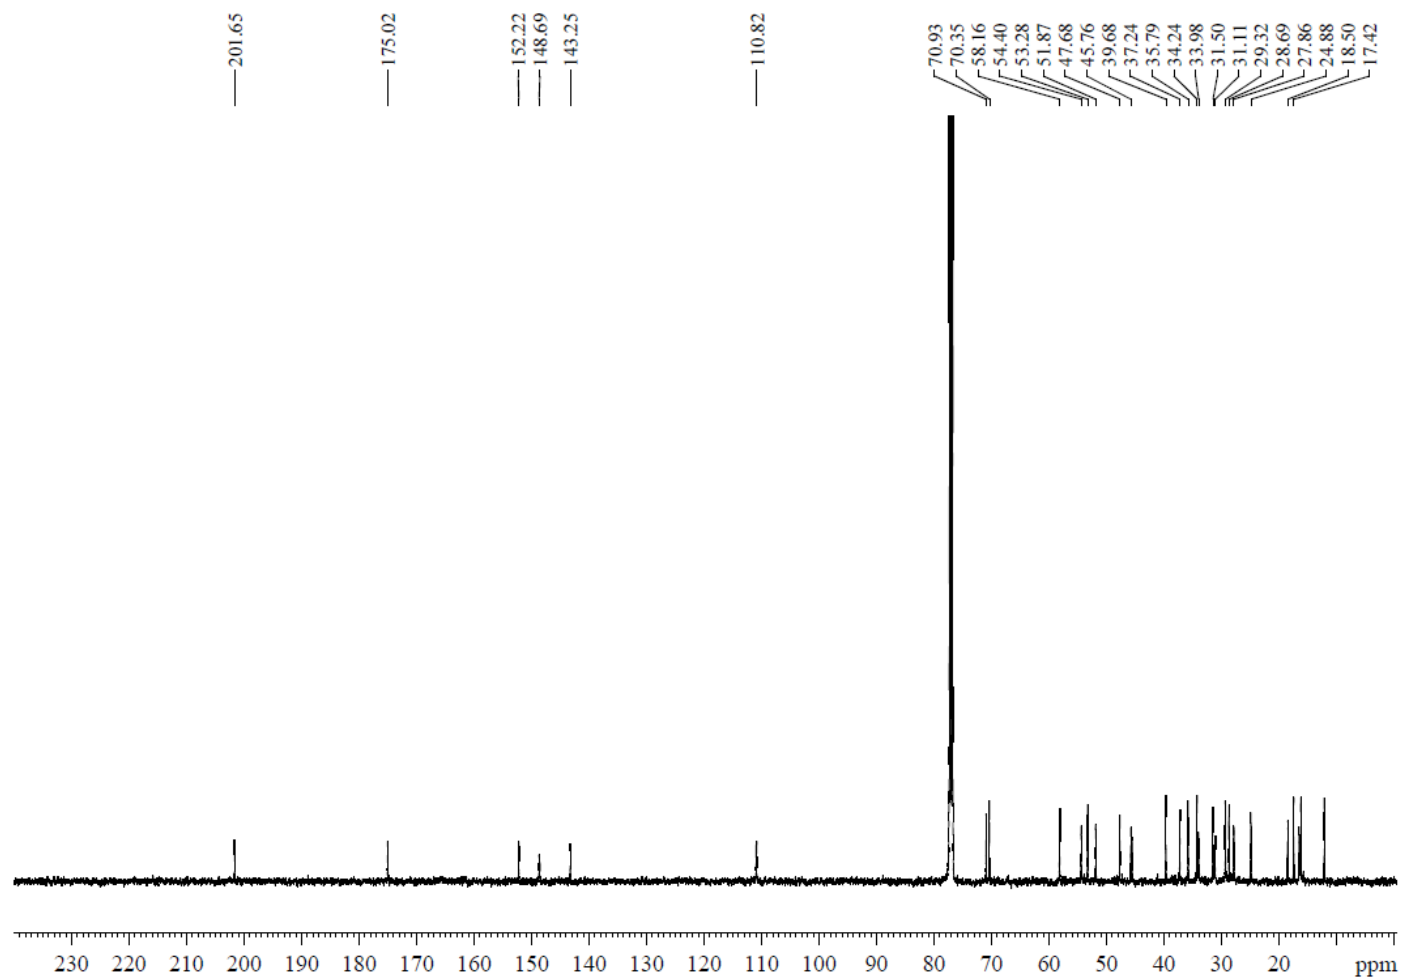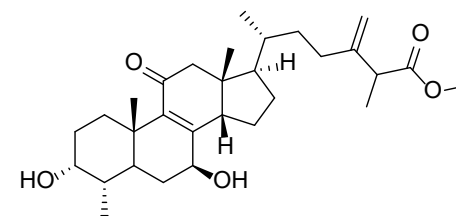

Figure S23  $^1\text{H}$  NMR (500 MHz,  $\text{CDCl}_3$ ) spectrum of methyl 3 $\beta$ ,12 $\beta$ -dihydroxy-11-oxo-4 $\beta$ -methylergosta-8,24(28)-dien-26-oate (methyl antcin M). (28)

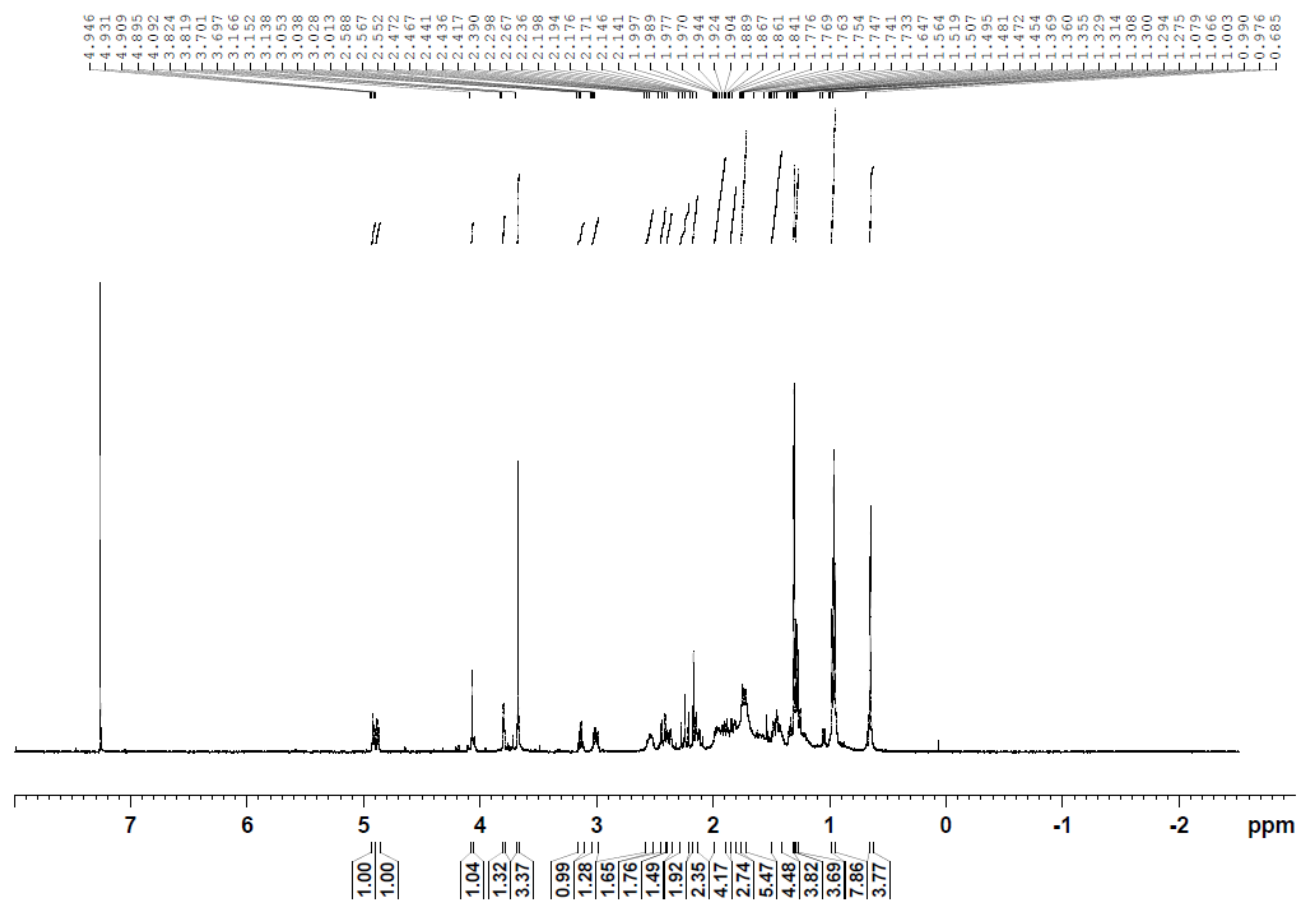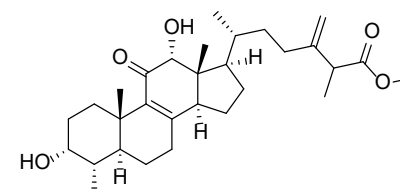

Figure S24  $^{13}\text{C}$  NMR (125 MHz,  $\text{CDCl}_3$ ) spectrum of methyl 3 $\beta$ ,12 $\beta$ -dihydroxy-11-oxo-4 $\beta$ -methylergosta-8,24(28)-dien-26-oate (methyl antcin M). (28)

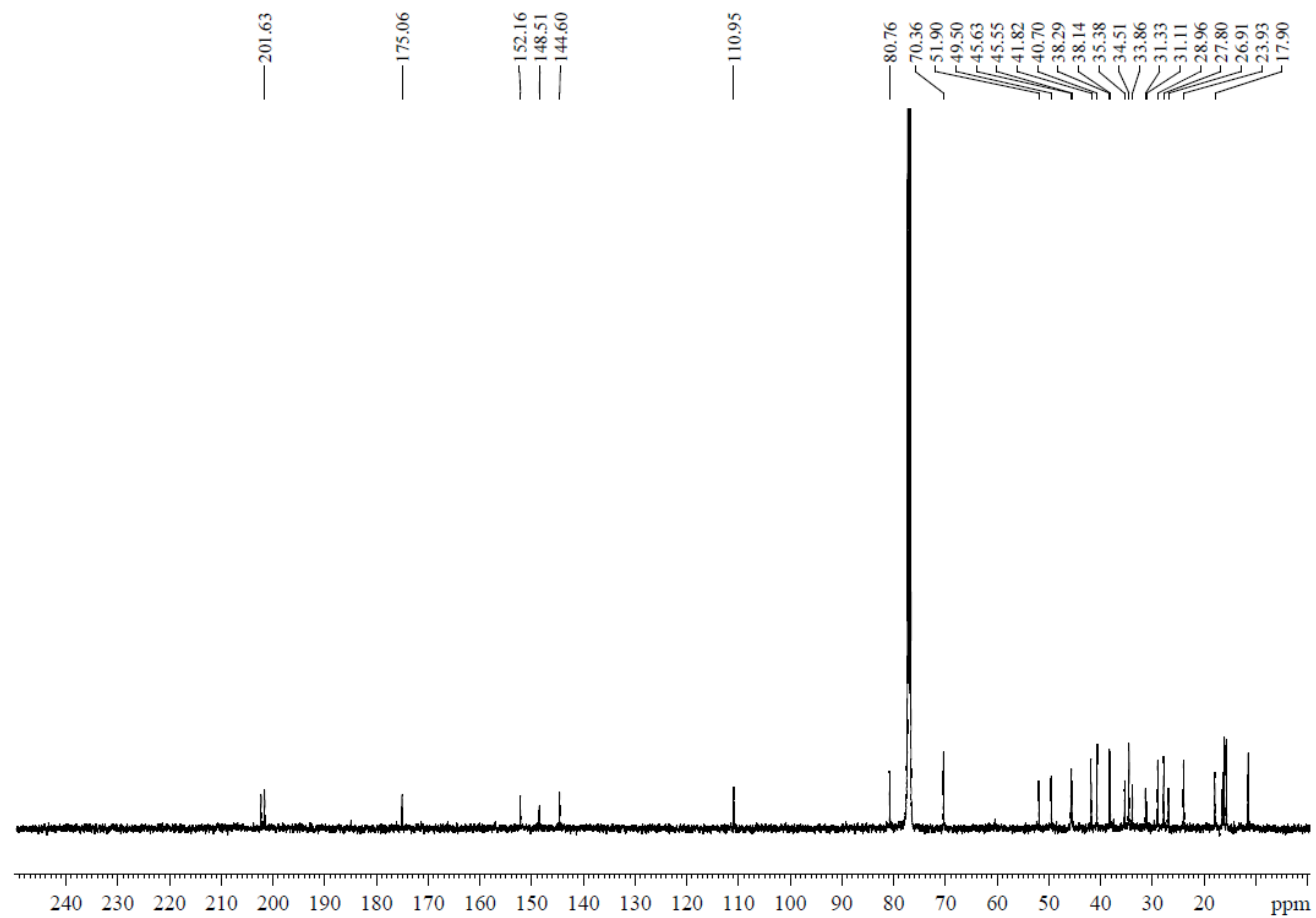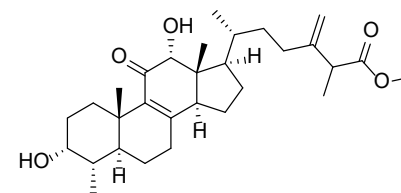

### Figure S25 References for known compounds

- methyl 3 $\alpha$ ,7 $\alpha$ ,12 $\alpha$ -trihydroxy-4 $\alpha$ -methylergosta-8,24(28)-dien-11-on-26-oate (**6**), [1]
- zhankuic acid A methyl ester (**8**), [2]
- methyl-7 $\beta$ -hydroxy-3,11-dioxo-4 $\alpha$ -methylergosta-8,24(28)-dien-26-oate (**12**), [2]
- methyl 3 $\alpha$ ,12 $\alpha$ -dihydroxy 4 $\alpha$ -methylergosta-8,24(28)-diene-7,11-dion-26-oate (methyl antcinatate H, **16**), [3]
- methyl 3 $\alpha$ -hydroxy-7,11-dioxo-4 $\alpha$ -methylergosta-8,24(28)-dien-26-oate (**20**), [2]
- methyl 7 $\beta$ -hydroxy-3,11-dioxo-4 $\alpha$ -methylergosta-8,24(28)-dien-26-oate (**22**), [2]
- methyl 4 $\alpha$ -methylergosta-8,24(28)-diene-3,11-dion-26-oate (**24**), [2]
- methyl 3 $\beta$ ,12 $\beta$ -dihydroxy-11-oxo-4 $\beta$ -methylergosta-8,24(28)-dien-26-oate (methyl antcin M, **26**) [4]

### Reference

- [1] C.C. Shen, Y.H. Wang, T.T. Chang, L.C. Lin, M.J. Don, Y.C. Hou, K.T. Liou, S. Chang, W.Y. Wang, H.C. Ko, Y.C. Shen, Anti-inflammatory ergostanes from the basidiomata of *Antrodia salmonea*, *Planta Med.* 73 (2007) 1208-1213. <http://doi.org/10.1055/s-2007-981591>
- [2] S.J. Wu, W.L. Leu, C.H. Chen, C.H. Chao, D.Y. Shen, H.H. Chan, E.J. Lee, T.S. Wu, Y.H. Wang, Y.C. Shen, K. Qian, K.F. Bastow, K.H. Lee, Camphorastins A–J, Potent Cytotoxic and Anti-inflammatory Triterpenoids from the Fruiting Body of *Taiwanofungus camphoratus*, *J. Nat. Prod.* 73 (2010) 1756-1762. <http://doi.org/10.1021/np1002143>
- [3] S.W. Yang, Y.C. Shen, C.H. Chen, Steroids and triterpenoids of *Antrodia cinnamomea*—A fungus parasitic on *Cinnamomum micranthum*, *Phytochemistry* 41 (1996) 1389-1392. [http://doi.org/https://doi.org/10.1016/0031-9422\(95\)00767-9](http://doi.org/https://doi.org/10.1016/0031-9422(95)00767-9)
- [4] R. Gautam, S.M. Jachak, Recent developments in anti-inflammatory natural products, *Med. Res. Rev.* 29 (2009) 767-820. <http://doi.org/https://doi.org/10.1002/med.20156>
